# Supplementary material for: Genetic Predisposition for Immune System, Hormone, and Metabolic Dysfunction in Myalgic Encephalomyelitis/Chronic Fatigue Syndrome: A Pilot Study
Source: Front Pediatr. 2019 May 24;7:206. doi: 10.3389/fped.2019.00206 (PMC6542994; doi:10.3389/fped.2019.00206)
Supplement: Supplementary file 1 [file Table_1.XLSX]

## Sheet: Sheet1
Supplementary Table 1. SNPs that have fequency at least 0.1 in at least one cohort and at least 2-fold absolute difference for ME/CFS
RSID	Frequency_REF	Frequency_MECFS	Frequency_Ratio
rs1443434	0.665213	0.00261097	0.00392501
rs2912444	0.578512	0.00261097	0.00451324
rs3732832	0.558192	0.00261097	0.00467754
rs7607027	0.532982	0.00261097	0.00489879
rs12894467	0.482117	0.00261097	0.00541563
rs2286865	0.479983	0.00261097	0.00543971
rs1056444	0.479794	0.00261097	0.00544185
rs2289271	0.457048	0.00261097	0.00571267
rs1239344	0.454659	0.00261097	0.00574269
rs2243384	0.448876	0.00261097	0.00581668
rs2229813	0.433221	0.00261097	0.00602687
rs3173420	0.415872	0.00261097	0.00627829
rs516091	0.410494	0.00261097	0.00636055
rs1033638	0.799757	0.00522193	0.0065294
rs6964211	0.381909	0.00261097	0.00683662
rs6794702	0.380848	0.00261097	0.00685566
rs1044104	0.37827	0.00261097	0.00690239
rs10408162	0.725756	0.00522193	0.00719516
rs2581341	0.72242	0.00522193	0.00722839
rs34587586	0.3574	0.00261097	0.00730544
rs1045482	0.353552	0.00261097	0.00738496
rs651970	0.70627	0.00522193	0.00739368
rs910695	0.346425	0.00261097	0.00753689
rs9277538	0.338198	0.00261097	0.00772023
rs222747	0.660676	0.00522193	0.00790392
rs1491235	0.324247	0.00261097	0.0080524
rs838142	0.318447	0.00261097	0.00819906
rs7251858	0.310835	0.00261097	0.00839985
rs6573305	0.309728	0.00261097	0.00842987
rs3824603	0.302449	0.00261097	0.00863275
rs3748535	0.592918	0.00522193	0.00880717
rs3130186	0.294336	0.00261097	0.0088707
rs10097844	0.288612	0.00261097	0.00904663
rs231394	0.570779	0.00522193	0.00914878
rs3008	0.563348	0.00522193	0.00926946
rs3736591	0.558034	0.00522193	0.00935773
rs1054973	0.278111	0.00261097	0.00938822
rs1186717	0.277428	0.00261097	0.00941133
rs12154	0.275694	0.00261097	0.00947052
rs686658	0.820508	0.0078329	0.0095464
rs10417974	0.814808	0.0078329	0.00961318
rs1131598	0.270604	0.00261097	0.00964866
rs3213422	0.269448	0.00261097	0.00969006
rs250316	0.802184	0.0078329	0.00976447
rs730720	0.267344	0.00261097	0.00976632
rs1885986	0.265288	0.00261097	0.00984201
rs4789015	0.530025	0.00522193	0.00985224
rs2236639	0.792463	0.0078329	0.00988424
rs1060590	0.264008	0.00261097	0.00988972
rs2230622	0.263291	0.00261097	0.00991665
rs17062547	0.260823	0.00261097	0.0100105
rs1152781	0.258663	0.00261097	0.0100941
rs17168353	0.258132	0.00261097	0.0101148
rs3803610	0.257184	0.00261097	0.0101521
rs754464	0.25635	0.00261097	0.0101852
rs3795821	0.256198	0.00261097	0.0101912
rs1057804	0.766472	0.0078329	0.0102194
rs10609	0.253848	0.00261097	0.0102855
rs12026	0.253716	0.00261097	0.0102909
rs3737502	0.251359	0.00261097	0.0103874
rs1055447	0.496891	0.00522193	0.0105092
rs12065426	0.247214	0.00261097	0.0105616
rs42038	0.246834	0.00261097	0.0105778
rs13034206	0.244332	0.00261097	0.0106861
rs9990	0.244257	0.00261097	0.0106894
rs3742520	0.484732	0.00522193	0.0107728
rs1509964	0.242058	0.00261097	0.0107865
rs1062827	0.241527	0.00261097	0.0108102
rs7639705	0.24083	0.00261097	0.0108415
rs323347	0.240379	0.00261097	0.0108619
rs10872670	0.719817	0.0078329	0.0108818
rs745829	0.238343	0.00261097	0.0109547
rs7495931	0.236978	0.00261097	0.0110178
rs9416	0.235878	0.00261097	0.0110691
rs1498468	0.707537	0.0078329	0.0110707
rs8080	0.234893	0.00261097	0.0111156
rs3205144	0.231898	0.00261097	0.0112591
rs1050900	0.23186	0.00261097	0.011261
rs1390938	0.694973	0.0078329	0.0112708
rs129882	0.230988	0.00261097	0.0113035
rs2306434	0.230078	0.00261097	0.0113482
rs739692	0.229078	0.00261097	0.0113977
rs674155	0.685166	0.0078329	0.0114321
rs571564	0.679089	0.0078329	0.0115344
rs775882	0.225948	0.00261097	0.0115556
rs886128	0.225643	0.00261097	0.0115712
rs12648093	0.675307	0.0078329	0.011599
rs1052371	0.223444	0.00261097	0.0116851
rs41304257	0.222496	0.00261097	0.0117349
rs62287849	0.220638	0.00261097	0.0118337
rs2152143	0.220635	0.00261097	0.0118339
rs10719	0.65884	0.0078329	0.0118889
rs1037590	0.219349	0.00261097	0.0119033
rs2910344	0.656039	0.0078329	0.0119397
rs269277	0.218478	0.00261097	0.0119507
rs2391199	0.870215	0.0104439	0.0120015
rs1109845	0.434718	0.00522193	0.0120122
rs524023	0.43396	0.00522193	0.0120332
rs61977410	0.215938	0.00261097	0.0120913
rs586024	0.849699	0.0104439	0.0122913
rs11845046	0.211806	0.00261097	0.0123272
rs700165	0.211502	0.00261097	0.0123449
rs900126	0.210099	0.00261097	0.0124273
rs707969	0.83854	0.0104439	0.0124548
rs2286656	0.209237	0.00261097	0.0124785
rs12357	0.416597	0.00522193	0.0125347
rs17854013	0.207498	0.00261097	0.0125831
rs17624707	0.207029	0.00261097	0.0126116
rs1045570	0.828114	0.0104439	0.0126116
rs3889480	0.206422	0.00261097	0.0126487
rs2296889	0.812799	0.0104439	0.0128493
rs13264163	0.20301	0.00261097	0.0128613
rs2298614	0.202593	0.00261097	0.0128877
rs13215418	0.202062	0.00261097	0.0129216
rs9822460	0.20167	0.00261097	0.0129467
rs1036199	0.80475	0.0104439	0.0129778
rs7526812	0.200814	0.00261097	0.0130019
rs1877363	0.801956	0.0104439	0.013023
rs2277969	0.199275	0.00261097	0.0131023
rs2309818	0.596937	0.0078329	0.0131218
rs3762001	0.198863	0.00261097	0.0131295
rs75130475	0.198335	0.00261097	0.0131644
rs1861954	0.197058	0.00261097	0.0132497
rs6051545	0.196635	0.00261097	0.0132782
rs156372	0.196603	0.00261097	0.0132804
rs3805410	0.196035	0.00261097	0.0133189
rs762562	0.195237	0.00261097	0.0133733
rs55905564	0.194464	0.00261097	0.0134265
rs12637997	0.193381	0.00261097	0.0135017
rs3815746	0.192455	0.00261097	0.0135666
rs2664570	0.192168	0.00261097	0.0135869
rs4801296	0.384073	0.00522193	0.0135962
rs7653981	0.19194	0.00261097	0.013603
rs11078563	0.191541	0.00261097	0.0136314
rs74214843	0.190424	0.00261097	0.0137113
rs628039	0.379824	0.00522193	0.0137483
rs922483	0.379407	0.00522193	0.0137634
rs4373934	0.189362	0.00261097	0.0137882
rs3249	0.189059	0.00261097	0.0138103
rs9564692	0.37793	0.00522193	0.0138172
rs808	0.18868	0.00261097	0.0138381
rs2272563	0.752028	0.0104439	0.0138876
rs1574479	0.186859	0.00261097	0.0139729
rs1058791	0.186481	0.00261097	0.0140012
rs907606	0.371742	0.00522193	0.0140472
rs8040932	0.185752	0.00261097	0.0140562
rs2891133	0.556449	0.0078329	0.0140766
rs1042153	0.185378	0.00261097	0.0140846
rs8670	0.185153	0.00261097	0.0141017
rs16861709	0.184965	0.00261097	0.014116
rs3746915	0.553378	0.0078329	0.0141547
rs12806	0.184207	0.00261097	0.0141741
rs1071676	0.18379	0.00261097	0.0142062
rs3737347	0.183755	0.00261097	0.014209
rs1043435	0.183524	0.00261097	0.0142268
rs1361530	0.183259	0.00261097	0.0142474
rs2236426	0.18324	0.00261097	0.0142489
rs2821008	0.182294	0.00261097	0.0143228
rs16993997	0.182113	0.00261097	0.0143371
rs709611	0.724733	0.0104439	0.0144106
rs3774225	0.180896	0.00261097	0.0144335
rs558813	0.180896	0.00261097	0.0144335
rs3745313	0.178368	0.00261097	0.0146381
rs1799983	0.711645	0.0104439	0.0146757
rs3811773	0.710099	0.0104439	0.0147076
rs34715719	0.177264	0.00261097	0.0147293
rs10150771	0.177155	0.00261097	0.0147383
rs1353681	0.17689	0.00261097	0.0147604
rs1777353	0.35315	0.00522193	0.0147867
rs3760008	0.352453	0.00522193	0.014816
rs9680	0.176094	0.00261097	0.0148271
rs805657	0.175397	0.00261097	0.014886
rs3756669	0.175094	0.00261097	0.0149118
rs4861	0.175032	0.00261097	0.0149171
rs12126648	0.700053	0.0104439	0.0149187
rs10491246	0.174994	0.00261097	0.0149203
rs1641512	0.69213	0.0104439	0.0150895
rs1126545	0.171745	0.00261097	0.0152026
rs14863	0.171582	0.00261097	0.015217
rs6498540	0.342975	0.00522193	0.0152254
rs8466	0.171355	0.00261097	0.0152372
rs17199	0.683031	0.0104439	0.0152905
rs3011621	0.679733	0.0104439	0.0153647
rs1559595	0.167943	0.00261097	0.0155467
rs10036244	0.167716	0.00261097	0.0155678
rs15971	0.167261	0.00261097	0.0156101
rs8064	0.165668	0.00261097	0.0157602
rs11807657	0.165062	0.00261097	0.0158181
rs13387611	0.490181	0.0078329	0.0159796
rs35967904	0.162673	0.00261097	0.0160504
rs2278372	0.16237	0.00261097	0.0160803
rs2290022	0.161347	0.00261097	0.0161823
rs6706	0.161233	0.00261097	0.0161937
rs1055659	0.160892	0.00261097	0.0162281
rs3810	0.481917	0.0078329	0.0162536
rs12532	0.320532	0.00522193	0.0162915
rs607666	0.158579	0.00261097	0.0164648
rs11605881	0.158503	0.00261097	0.0164727
rs4823006	0.475207	0.0078329	0.0164831
rs7135515	0.158124	0.00261097	0.0165121
rs8100532	0.47388	0.0078329	0.0165293
rs3800325	0.157797	0.00261097	0.0165464
rs6787026	0.157669	0.00261097	0.0165598
rs6670668	0.157328	0.00261097	0.0165957
rs3827038	0.156835	0.00261097	0.0166479
rs17046072	0.155736	0.00261097	0.0167653
rs9276976	0.155167	0.00261097	0.0168268
rs11709029	0.154978	0.00261097	0.0168473
rs952319	0.15475	0.00261097	0.0168722
rs17495592	0.153347	0.00261097	0.0170265
rs7659	0.61248	0.0104439	0.0170518
rs5193	0.153006	0.00261097	0.0170645
rs11770838	0.152968	0.00261097	0.0170687
rs10878	0.152627	0.00261097	0.0171068
rs1026048	0.15221	0.00261097	0.0171537
rs7350355	0.304222	0.00522193	0.0171649
rs2740584	0.302411	0.00522193	0.0172677
rs117385282	0.150791	0.00261097	0.0173151
rs7393	0.45193	0.0078329	0.0173321
rs2809243	0.602168	0.0104439	0.0173438
rs3809116	0.301008	0.00522193	0.0173482
rs4072111	0.150417	0.00261097	0.0173582
rs11101821	0.15039	0.00261097	0.0173613
rs1060037	0.150239	0.00261097	0.0173787
rs3740046	0.150125	0.00261097	0.0173919
rs768994	0.149967	0.00261097	0.0174103
rs355477	0.599827	0.0104439	0.0174115
rs2241002	0.149123	0.00261097	0.0175088
rs2296356	0.14891	0.00261097	0.0175339
rs7254346	0.148609	0.00261097	0.0175694
rs12147025	0.148571	0.00261097	0.0175739
rs1341667	0.594032	0.0104439	0.0175813
rs9603932	0.148495	0.00261097	0.0175829
rs1063537	0.148305	0.00261097	0.0176054
rs2229309	0.442655	0.0078329	0.0176953
rs17057781	0.147396	0.00261097	0.017714
rs3811444	0.294298	0.00522193	0.0177437
rs1745	0.294147	0.00522193	0.0177528
rs12010722	0.146827	0.00261097	0.0177826
rs6047011	0.440026	0.0078329	0.017801
rs17333103	0.146483	0.00261097	0.0178244
rs1046691	0.144818	0.00261097	0.0180293
rs6679100	0.577868	0.0104439	0.0180731
rs9897606	0.144173	0.00261097	0.01811
rs14879	0.5762	0.0104439	0.0181254
rs11605196	0.144036	0.00261097	0.0181272
rs10245798	0.143946	0.00261097	0.0181385
rs3744979	0.143688	0.00261097	0.0181711
rs1852400	0.287019	0.00522193	0.0181937
rs3770	0.428956	0.0078329	0.0182604
rs10403723	0.285734	0.00522193	0.0182755
rs12149862	0.142846	0.00261097	0.0182782
rs1044681	0.142695	0.00261097	0.0182975
rs3766191	0.142695	0.00261097	0.0182975
rs10870125	0.142543	0.00261097	0.018317
rs3764713	0.142391	0.00261097	0.0183366
rs11605607	0.141853	0.00261097	0.0184061
rs1071598	0.141788	0.00261097	0.0184146
rs13426287	0.424862	0.0078329	0.0184363
rs30126	0.141482	0.00261097	0.0184544
rs1046161	0.421943	0.0078329	0.0185639
rs6008795	0.140352	0.00261097	0.018603
rs34665498	0.1397	0.00261097	0.0186898
rs12190030	0.279362	0.00522193	0.0186923
rs2470531	0.555539	0.0104439	0.0187995
rs17692899	0.138221	0.00261097	0.0188898
rs17257120	0.138108	0.00261097	0.0189052
rs1060106	0.275836	0.00522193	0.0189313
rs838143	0.137842	0.00261097	0.0189417
rs2294086	0.137501	0.00261097	0.0189887
rs1046623	0.274699	0.00522193	0.0190097
rs11087326	0.409887	0.0078329	0.0191099
rs8085335	0.136629	0.00261097	0.0191099
rs2242655	0.136038	0.00261097	0.0191929
rs2614666	0.135681	0.00261097	0.0192434
rs2076506	0.135452	0.00261097	0.019276
rs330908	0.405982	0.0078329	0.0192937
rs2282537	0.134853	0.00261097	0.0193616
rs920829	0.134769	0.00261097	0.0193736
rs17167553	0.134421	0.00261097	0.0194238
rs1657139	0.134176	0.00261097	0.0194593
rs1127203	0.134089	0.00261097	0.0194719
rs2266890	0.267902	0.00522193	0.0194919
rs2983640	0.535077	0.0104439	0.0195184
rs11589949	0.133179	0.00261097	0.0196049
rs1059234	0.133024	0.00261097	0.0196278
rs11613495	0.13276	0.00261097	0.0196668
rs1043851	0.265411	0.00522193	0.0196749
rs1044744	0.396429	0.0078329	0.0197586
rs861818	0.132042	0.00261097	0.0197738
rs494680	0.131966	0.00261097	0.0197851
rs1064826	0.789711	0.0156658	0.0198374
rs9972231	0.131478	0.00261097	0.0198586
rs1128334	0.130601	0.00261097	0.0199919
rs727162	0.261153	0.00522193	0.0199957
rs1051331	0.130429	0.00261097	0.0200183
rs10964539	0.130412	0.00261097	0.0200209
rs8301	0.260141	0.00522193	0.0200735
rs16868178	0.129957	0.00261097	0.020091
rs1126526	0.129881	0.00261097	0.0201028
rs3191064	0.129805	0.00261097	0.0201145
rs2650220	0.129426	0.00261097	0.0201734
rs2281756	0.516112	0.0104439	0.0202357
rs8736	0.386762	0.0078329	0.0202525
rs2291841	0.128744	0.00261097	0.0202803
rs1053414	0.127985	0.00261097	0.0204006
rs879161	0.127948	0.00261097	0.0204065
rs1048786	0.127679	0.00261097	0.0204495
rs3761592	0.127222	0.00261097	0.0205229
rs35899692	0.127067	0.00261097	0.0205479
rs16997869	0.253507	0.00522193	0.0205988
rs7295294	0.126696	0.00261097	0.0206081
rs2285928	0.253128	0.00522193	0.0206296
rs3737862	0.126545	0.00261097	0.0206327
rs3812678	0.126355	0.00261097	0.0206637
rs2304588	0.125787	0.00261097	0.020757
rs2074633	0.250929	0.00522193	0.0208104
rs6691840	0.250805	0.00522193	0.0208207
rs237005	0.375654	0.0078329	0.0208514
rs1753288	0.375341	0.0078329	0.0208688
rs11795624	0.249488	0.00522193	0.0209306
rs8949	0.124687	0.00261097	0.0209402
rs1057258	0.249071	0.00522193	0.0209656
rs2305165	0.124491	0.00261097	0.0209731
rs11043265	0.123635	0.00261097	0.0211183
rs3741489	0.123626	0.00261097	0.0211199
rs12036607	0.247062	0.00522193	0.0211361
rs3827760	0.123107	0.00261097	0.0212089
rs198424	0.24619	0.00522193	0.021211
rs28491316	0.36902	0.0078329	0.0212262
rs3735400	0.122965	0.00261097	0.0212334
rs10033500	0.245925	0.00522193	0.0212338
rs7697037	0.122901	0.00261097	0.0212445
rs1048244	0.368072	0.0078329	0.0212809
rs3803949	0.245129	0.00522193	0.0213028
rs12747620	0.122564	0.00261097	0.0213029
rs16910125	0.122488	0.00261097	0.0213161
rs1806931	0.122115	0.00261097	0.0213812
rs4498353	0.122109	0.00261097	0.0213823
rs6457878	0.122109	0.00261097	0.0213823
rs13193465	0.122071	0.00261097	0.0213889
rs1058678	0.12192	0.00261097	0.0214154
rs17625090	0.121541	0.00261097	0.0214822
rs3748928	0.242968	0.00522193	0.0214923
rs17024876	0.242892	0.00522193	0.021499
rs12531501	0.120934	0.00261097	0.02159
rs2067061	0.362249	0.0078329	0.021623
rs4599797	0.120707	0.00261097	0.0216306
rs11549949	0.120454	0.00261097	0.021676
rs2285795	0.240049	0.00522193	0.0217536
rs4576	0.237622	0.00522193	0.0219758
rs3813316	0.118659	0.00261097	0.0220039
rs3814536	0.118622	0.00261097	0.0220108
rs2738467	0.355751	0.0078329	0.0220179
rs4307600	0.236637	0.00522193	0.0220673
rs5771041	0.118309	0.00261097	0.022069
rs1151	0.236485	0.00522193	0.0220815
rs1801906	0.117977	0.00261097	0.0221311
rs17193714	0.117939	0.00261097	0.0221383
rs2936051	0.235363	0.00522193	0.0221867
rs2075960	0.235305	0.00522193	0.0221922
rs6653049	0.11756	0.00261097	0.0222096
rs16980188	0.117446	0.00261097	0.0222312
rs2343388	0.117257	0.00261097	0.022267
rs2833598	0.234476	0.00522193	0.0222706
rs3802512	0.234476	0.00522193	0.0222706
rs11555602	0.117219	0.00261097	0.0222743
rs3736508	0.117047	0.00261097	0.022307
rs2276904	0.116841	0.00261097	0.0223463
rs4150530	0.116119	0.00261097	0.0224853
rs8091003	0.115984	0.00261097	0.0225114
rs2254813	0.346653	0.0078329	0.0225958
rs59261726	0.461218	0.0104439	0.0226441
rs6029617	0.114414	0.00261097	0.0228203
rs3827900	0.454849	0.0104439	0.0229612
rs12470170	0.113504	0.00261097	0.0230033
rs1110446	0.226932	0.00522193	0.023011
rs1048365	0.226401	0.00522193	0.023065
rs35937022	0.226366	0.00522193	0.0230685
rs13518	0.225718	0.00522193	0.0231348
rs886129	0.224354	0.00522193	0.0232754
rs6616255	0.111915	0.00261097	0.0233299
rs6116997	0.334787	0.0078329	0.0233967
rs11651537	0.445553	0.0104439	0.0234402
rs1126605	0.111303	0.00261097	0.0234582
rs10819317	0.222382	0.00522193	0.0234818
rs17184326	0.111155	0.00261097	0.0234894
rs1104755	0.111115	0.00261097	0.0234979
rs17852167	0.111084	0.00261097	0.0235044
rs2662256	0.11104	0.00261097	0.0235137
rs2235592	0.221601	0.00522193	0.0235646
rs3757557	0.110774	0.00261097	0.0235702
rs61744357	0.110755	0.00261097	0.0235742
rs2288949	0.110672	0.00261097	0.0235919
rs2433600	0.110016	0.00261097	0.0237326
rs1150738	0.109902	0.00261097	0.0237572
rs41311191	0.109886	0.00261097	0.0237607
rs1126504	0.219592	0.00522193	0.0237802
rs1062853	0.219425	0.00522193	0.0237983
rs3825591	0.21916	0.00522193	0.023827
rs17018890	0.218942	0.00522193	0.0238508
rs362303	0.109409	0.00261097	0.0238643
rs2010875	0.218613	0.00522193	0.0238866
rs4315595	0.21825	0.00522193	0.0239264
rs7567	0.217985	0.00522193	0.0239555
rs3777373	0.108841	0.00261097	0.0239888
rs7264	0.325878	0.0078329	0.0240363
rs6060341	0.216734	0.00522193	0.0240937
rs7044386	0.108234	0.00261097	0.0241233
rs17776256	0.107922	0.00261097	0.0241931
rs4583705	0.107552	0.00261097	0.0242763
rs7726005	0.107072	0.00261097	0.0243851
rs11922760	0.106831	0.00261097	0.0244402
rs2523898	0.106782	0.00261097	0.0244514
rs13332377	0.106642	0.00261097	0.0244835
rs4802546	0.106604	0.00261097	0.0244922
rs34752754	0.213146	0.00522193	0.0244993
rs10900482	0.212981	0.00522193	0.0245183
rs12421266	0.106339	0.00261097	0.0245532
rs3742485	0.212563	0.00522193	0.0245665
rs11673003	0.106225	0.00261097	0.0245796
rs2229668	0.106093	0.00261097	0.0246102
rs2279622	0.10596	0.00261097	0.0246411
rs12654326	0.105922	0.00261097	0.0246499
rs12632	0.316779	0.0078329	0.0247267
rs1057719	0.316476	0.0078329	0.0247504
rs1133109	0.315339	0.0078329	0.0248396
rs5742714	0.105088	0.00261097	0.0248455
rs3746297	0.105082	0.00261097	0.0248469
rs17600420	0.314922	0.0078329	0.0248725
rs10888415	0.627038	0.0156658	0.0249838
rs5006887	0.20791	0.00522193	0.0251163
rs16847945	0.10395	0.00261097	0.0251175
rs72992191	0.103533	0.00261097	0.0252187
rs7456	0.517325	0.0130548	0.0252353
rs28362542	0.103298	0.00261097	0.0252761
rs9600566	0.309766	0.0078329	0.0252865
rs12637730	0.206384	0.00522193	0.025302
rs1125398	0.206232	0.00522193	0.0253207
rs524492	0.308894	0.0078329	0.0253579
rs10486432	0.102585	0.00261097	0.0254517
rs9488	0.102358	0.00261097	0.0255082
rs527984	0.204526	0.00522193	0.0255319
rs3204953	0.101895	0.00261097	0.0256241
rs1407856	0.202888	0.00522193	0.025738
rs9677004	0.202855	0.00522193	0.0257422
rs707952	0.20254	0.00522193	0.0257822
rs7099565	0.405054	0.0104439	0.0257839
rs952865	0.202366	0.00522193	0.0258044
rs2297756	0.505042	0.0130548	0.025849
rs1052998	0.201797	0.00522193	0.0258772
rs2508030	0.201759	0.00522193	0.025882
rs8117825	0.100842	0.00261097	0.0258917
rs12519254	0.100766	0.00261097	0.0259112
rs11559060	0.100652	0.00261097	0.0259405
rs2075734	0.20066	0.00522193	0.0260238
rs72628271	0.200627	0.00522193	0.0260281
rs11240121	0.300591	0.0078329	0.0260583
rs2583016	0.700508	0.0182768	0.0260907
rs3799893	0.199219	0.00522193	0.026212
rs9163	0.198082	0.00522193	0.0263625
rs6499496	0.197968	0.00522193	0.0263777
rs3732477	0.296436	0.0078329	0.0264236
rs11571288	0.29608	0.0078329	0.0264553
rs710893	0.786716	0.0208877	0.0265505
rs214505	0.1963	0.00522193	0.0266018
rs8075897	0.294109	0.0078329	0.0266326
rs2206107	0.292365	0.0078329	0.0267915
rs2294919	0.29191	0.0078329	0.0268333
rs3741259	0.19448	0.00522193	0.0268507
rs2345436	0.680643	0.0182768	0.0268522
rs2906100	0.291265	0.0078329	0.0268927
rs6710142	0.192951	0.00522193	0.0270635
rs11156	0.191447	0.00522193	0.0272761
rs3812073	0.191334	0.00522193	0.0272922
rs2240311	0.286792	0.0078329	0.0273121
rs6804888	0.476609	0.0130548	0.0273911
rs3183297	0.2852	0.0078329	0.0274646
rs2154028	0.855224	0.0234987	0.0274767
rs4603206	0.378763	0.0104439	0.0275736
rs1046383	0.188983	0.00522193	0.0276318
rs745338	0.376829	0.0104439	0.0277151
rs10751478	0.752653	0.0208877	0.0277521
rs17057718	0.187761	0.00522193	0.0278116
rs12488648	0.562211	0.0156658	0.0278646
rs11555405	0.279178	0.0078329	0.028057
rs2972175	0.185761	0.00522193	0.028111
rs1056947	0.185609	0.00522193	0.028134
rs1134546	0.185609	0.00522193	0.028134
rs4659554	0.276139	0.0078329	0.0283658
rs10920269	0.184017	0.00522193	0.0283774
rs4979863	0.275988	0.0078329	0.0283813
rs3744436	0.183941	0.00522193	0.0283892
rs10406026	0.366366	0.0104439	0.0285066
rs2821040	0.182804	0.00522193	0.0285657
rs10896818	0.182686	0.00522193	0.0285842
rs1992188	0.365191	0.0104439	0.0285984
rs3747179	0.181591	0.00522193	0.0287566
rs2578641	0.181287	0.00522193	0.0288048
rs1057687	0.181022	0.00522193	0.0288469
rs17188113	0.180112	0.00522193	0.0289927
rs72775710	0.179847	0.00522193	0.0290354
rs1141390	0.357571	0.0104439	0.0292078
rs2072896	0.178634	0.00522193	0.0292326
rs3822909	0.178558	0.00522193	0.029245
rs1043515	0.445674	0.0130548	0.0292923
rs27405	0.445599	0.0130548	0.0292973
rs1541185	0.266099	0.0078329	0.029436
rs3750249	0.354765	0.0104439	0.0294388
rs2277291	0.176814	0.00522193	0.0295335
rs1540108	0.176582	0.00522193	0.0295723
rs1140039	0.351391	0.0104439	0.0297215
rs2291748	0.175677	0.00522193	0.0297246
rs3844283	0.350478	0.0104439	0.0297989
rs2290732	0.612897	0.0182768	0.0298203
rs10094238	0.350178	0.0104439	0.0298244
rs4801177	0.699217	0.0208877	0.029873
rs9277533	0.348662	0.0104439	0.0299541
rs2728121	0.174312	0.00522193	0.0299574
rs4900131	0.173971	0.00522193	0.0300161
rs11900	0.26052	0.0078329	0.0300664
rs3809429	0.173452	0.00522193	0.0301059
rs4807145	0.692526	0.0208877	0.0301617
rs3809899	0.258473	0.0078329	0.0303045
rs419558	0.258283	0.0078329	0.0303268
rs16919034	0.25798	0.0078329	0.0303624
rs2306735	0.599615	0.0182768	0.0304808
rs13287	0.342065	0.0104439	0.0305318
rs1130821	0.170934	0.00522193	0.0305494
rs7528979	0.256312	0.0078329	0.03056
rs11954297	0.256198	0.0078329	0.0305736
rs1046860	0.170445	0.00522193	0.0306371
rs1550818	0.170445	0.00522193	0.0306371
rs4563403	0.170331	0.00522193	0.0306576
rs9741	0.255402	0.0078329	0.0306689
rs11833667	0.170142	0.00522193	0.0306916
rs13280444	0.339891	0.0104439	0.0307271
rs9938333	0.169807	0.00522193	0.0307522
rs3747194	0.254682	0.0078329	0.0307556
rs3194515	0.423686	0.0130548	0.0308125
rs1941996	0.169118	0.00522193	0.0308774
rs1139793	0.676124	0.0208877	0.0308933
rs844046	0.759459	0.0234987	0.0309414
rs11639856	0.168674	0.00522193	0.0309587
rs2275260	0.252969	0.0078329	0.0309639
rs16916104	0.168246	0.00522193	0.0310375
rs28557435	0.671848	0.0208877	0.03109
rs10510437	0.167867	0.00522193	0.0311076
rs3750097	0.335734	0.0104439	0.0311076
rs9861850	0.251573	0.0078329	0.0311357
rs11572	0.669535	0.0208877	0.0311974
rs10743911	0.418227	0.0130548	0.0312147
rs185435	0.166536	0.00522193	0.0313562
rs12699085	0.166123	0.00522193	0.0314341
rs3821083	0.165706	0.00522193	0.0315132
rs312073	0.247479	0.0078329	0.0316508
rs8911	0.163773	0.00522193	0.0318852
rs6816868	0.163545	0.00522193	0.0319296
rs9986	0.325726	0.0104439	0.0320633
rs1061443	0.162711	0.00522193	0.0320933
rs1052648	0.24293	0.0078329	0.0322434
rs59743544	0.242589	0.0078329	0.0322888
rs1045688	0.242323	0.0078329	0.0323242
rs1064259	0.80116	0.0261097	0.0325898
rs1799822	0.15998	0.00522193	0.0326412
rs2382713	0.559898	0.0182768	0.032643
rs1047912	0.239897	0.0078329	0.0326511
rs11709673	0.319698	0.0104439	0.0326679
rs12636725	0.159645	0.00522193	0.0327096
rs10426256	0.239063	0.0078329	0.032765
rs1048055	0.717037	0.0234987	0.0327719
rs8737	0.318599	0.0104439	0.0327806
rs17558532	0.158853	0.00522193	0.0328727
rs9372948	0.158782	0.00522193	0.0328874
rs4706975	0.317424	0.0104439	0.0329019
rs17638867	0.158276	0.00522193	0.0329926
rs3115603	0.711665	0.0234987	0.0330193
rs1042151	0.158055	0.00522193	0.0330387
rs3816988	0.157604	0.00522193	0.0331332
rs1396115	0.236257	0.0078329	0.0331541
rs9260191	0.392967	0.0130548	0.0332212
rs1134043	0.157139	0.00522193	0.0332313
rs334348	0.314239	0.0104439	0.0332354
rs34291323	0.549701	0.0182768	0.0332486
rs303208	0.312533	0.0104439	0.0334168
rs2021731	0.156039	0.00522193	0.0334656
rs2233817	0.155975	0.00522193	0.0334793
rs12250	0.233831	0.0078329	0.0334981
rs2072692	0.233149	0.0078329	0.0335961
rs536850	0.233073	0.0078329	0.0336071
rs1058747	0.38843	0.0130548	0.0336092
rs2250670	0.387975	0.0130548	0.0336486
rs274751	0.154902	0.00522193	0.0337112
rs3678	0.154674	0.00522193	0.0337609
rs17014136	0.153651	0.00522193	0.0339857
rs3735576	0.230423	0.0078329	0.0339936
rs4798931	0.306657	0.0104439	0.0340572
rs757299	0.229964	0.0078329	0.0340614
rs2010506	0.153006	0.00522193	0.0341289
rs7764091	0.152845	0.00522193	0.0341649
rs2251588	0.152362	0.00522193	0.0342732
rs2517415	0.152172	0.00522193	0.034316
rs11002921	0.152059	0.00522193	0.0343415
rs4858770	0.228031	0.0078329	0.0343501
rs9348796	0.227652	0.0078329	0.0344073
rs9295759	0.227538	0.0078329	0.0344246
rs6563648	0.227424	0.0078329	0.0344418
rs1051288	0.227083	0.0078329	0.0344935
rs9713	0.681174	0.0234987	0.0344973
rs717768	0.37808	0.0130548	0.0345293
rs2242130	0.301767	0.0104439	0.034609
rs1044153	0.376867	0.0130548	0.0346404
rs3744725	0.225832	0.0078329	0.0346846
rs1052212	0.225453	0.0078329	0.0347429
rs6938529	0.222875	0.0078329	0.0351448
rs1551655	0.148571	0.00522193	0.0351477
rs2274755	0.148563	0.00522193	0.0351496
rs6894	0.222648	0.0078329	0.0351806
rs3548	0.296345	0.0104439	0.0352422
rs2863171	0.14785	0.00522193	0.0353191
rs17599	0.221756	0.0078329	0.0353221
rs1046819	0.221018	0.0078329	0.0354401
rs4790290	0.293199	0.0104439	0.0356204
rs6421572	0.805709	0.0287206	0.0356464
rs1051924	0.146448	0.00522193	0.0356572
rs11076207	0.292508	0.0104439	0.0357045
rs4952051	0.29191	0.0104439	0.0357777
rs7046	0.583251	0.0208877	0.0358126
rs199724	0.363636	0.0130548	0.0359008
rs10904	0.290507	0.0104439	0.0359505
rs10953315	0.21784	0.0078329	0.0359571
rs6659361	0.145201	0.00522193	0.0359635
rs6597266	0.362992	0.0130548	0.0359645
rs16829071	0.145143	0.00522193	0.0359778
rs1063318	0.217667	0.0078329	0.0359857
rs9429919	0.289825	0.0104439	0.0360351
rs869457	0.144171	0.00522193	0.0362204
rs12289558	0.214994	0.0078329	0.0364331
rs7693	0.286185	0.0104439	0.0364934
rs6833	0.428691	0.0156658	0.0365433
rs8112811	0.142638	0.00522193	0.0366097
rs891368	0.570286	0.0208877	0.0366268
rs7259845	0.14231	0.00522193	0.0366941
rs4640178	0.850671	0.0313316	0.0368316
rs7156590	0.353904	0.0130548	0.0368881
rs4488328	0.706043	0.0261097	0.0369803
rs11670591	0.845856	0.0313316	0.0370413
rs56285832	0.21135	0.0078329	0.0370613
rs17169667	0.140648	0.00522193	0.0371277
rs6474	0.280621	0.0104439	0.037217
rs257377	0.140155	0.00522193	0.0372583
rs6105334	0.420161	0.0156658	0.0372852
rs2000052	0.350027	0.0130548	0.0372966
rs17784271	0.349951	0.0130548	0.0373047
rs2584021	0.139901	0.00522193	0.0373259
rs12644	0.20972	0.0078329	0.0373493
rs4695253	0.34942	0.0130548	0.0373614
rs1800545	0.139396	0.00522193	0.0374611
rs9485296	0.139283	0.00522193	0.0374915
rs3733176	0.208924	0.0078329	0.0374916
rs11208979	0.208741	0.0078329	0.0375245
rs7476	0.34688	0.0130548	0.037635
rs9866564	0.69355	0.0261097	0.0376464
rs17516202	0.138449	0.00522193	0.0377174
rs11542855	0.276518	0.0104439	0.0377692
rs1886490	0.205929	0.0078329	0.0380369
rs13009279	0.274381	0.0104439	0.0380634
rs10794629	0.205778	0.0078329	0.0380648
rs11045681	0.13701	0.00522193	0.0381135
rs1039341	0.342103	0.0130548	0.0381605
rs4290817	0.478743	0.0182768	0.0381766
rs3743342	0.273068	0.0104439	0.0382464
rs3744438	0.136521	0.00522193	0.03825
rs3735485	0.818717	0.0313316	0.0382691
rs6511874	0.2046	0.0078329	0.038284
rs7201586	0.27231	0.0104439	0.0383528
rs2292611	0.272083	0.0104439	0.0383848
rs3203726	0.40765	0.0156658	0.0384295
rs2361519	0.135883	0.00522193	0.0384296
rs3732131	0.135681	0.00522193	0.0384868
rs9474613	0.13553	0.00522193	0.0385297
rs1339820	0.809235	0.0313316	0.0387175
rs719153	0.404238	0.0156658	0.0387539
rs8191509	0.269315	0.0104439	0.0387794
rs4790289	0.26905	0.0104439	0.0388176
rs6007891	0.13443	0.00522193	0.038845
rs7528419	0.20138	0.0078329	0.0388961
rs181206	0.268424	0.0104439	0.0389081
rs12464085	0.335061	0.0130548	0.0389625
rs527221	0.1339	0.00522193	0.0389987
rs1053087	0.400826	0.0156658	0.0390838
rs1801898	0.200053	0.0078329	0.0391541
rs7767581	0.598436	0.0234987	0.0392668
rs5015342	0.331526	0.0130548	0.039378
rs3088331	0.264918	0.0104439	0.039423
rs12530054	0.19865	0.0078329	0.0394306
rs3744730	0.132421	0.00522193	0.0394343
rs3744276	0.331033	0.0130548	0.0394366
rs3747120	0.33092	0.0130548	0.0394501
rs9935059	0.132328	0.00522193	0.039462
rs884522	0.2638	0.0104439	0.0395901
rs12719481	0.328683	0.0130548	0.0397186
rs3816780	0.13142	0.00522193	0.0397347
rs2682818	0.787839	0.0313316	0.039769
rs11947521	0.327432	0.0130548	0.0398704
rs753133	0.130905	0.00522193	0.039891
rs7998551	0.195959	0.0078329	0.0399721
rs1045241	0.260899	0.0104439	0.0400303
rs1546376	0.391235	0.0156658	0.0400419
rs2866943	0.195314	0.0078329	0.0401041
rs6065432	0.194973	0.0078329	0.0401743
rs14358	0.389832	0.0156658	0.040186
rs2279566	0.129919	0.00522193	0.0401938
rs9352	0.518881	0.0208877	0.0402553
rs9474	0.323868	0.0130548	0.0403091
rs10433573	0.323755	0.0130548	0.0403232
rs1163261	0.453067	0.0182768	0.0403401
rs1045172	0.193987	0.0078329	0.0403785
rs3753494	0.129012	0.00522193	0.0404763
rs4842994	0.192281	0.0078329	0.0407367
rs1053861	0.383881	0.0156658	0.040809
rs10972023	0.127796	0.00522193	0.0408615
rs2547074	0.255564	0.0104439	0.0408659
rs2298535	0.382667	0.0156658	0.0409385
rs61744267	0.127402	0.00522193	0.0409878
rs7187776	0.381833	0.0156658	0.0410279
rs7167	0.318144	0.0130548	0.0410343
rs7789085	0.317879	0.0130548	0.0410686
rs3189152	0.254038	0.0104439	0.0411114
rs66800041	0.823186	0.0339426	0.0412332
rs1046780	0.2529	0.0104439	0.0412964
rs1798	0.189097	0.0078329	0.0414226
rs16846616	0.125914	0.00522193	0.0414722
rs1258256	0.566078	0.0234987	0.0415114
rs2704505	0.940822	0.0391645	0.0416279
rs684260	0.752016	0.0313316	0.0416635
rs6826961	0.250219	0.0104439	0.0417389
rs2070581	0.312306	0.0130548	0.0418014
rs1064697	0.498139	0.0208877	0.0419315
rs10188787	0.931648	0.0391645	0.0420379
rs2179129	0.434491	0.0182768	0.0420648
rs1048535	0.310221	0.0130548	0.0420824
rs479632	0.247843	0.0104439	0.042139
rs276938	0.371716	0.0156658	0.0421445
rs11541643	0.123847	0.00522193	0.0421644
rs17553284	0.185761	0.0078329	0.0421665
rs10185950	0.123664	0.00522193	0.0422268
rs3751379	0.185172	0.0078329	0.0423007
rs4121653	0.123322	0.00522193	0.0423439
rs949140	0.739556	0.0313316	0.0423654
rs890579	0.491319	0.0208877	0.0425136
rs3811616	0.184207	0.0078329	0.0425223
rs2272296	0.184097	0.0078329	0.0425477
rs10909	0.122413	0.00522193	0.0426583
rs1812240	0.122244	0.00522193	0.0427173
rs78306866	0.549952	0.0234987	0.0427286
rs1018649	0.183297	0.0078329	0.0427334
rs3026912	0.122147	0.00522193	0.0427512
rs11064	0.244181	0.0104439	0.042771
rs11950492	0.121958	0.00522193	0.0428175
rs2271270	0.304686	0.0130548	0.0428468
rs11847165	0.182614	0.0078329	0.0428932
rs16968862	0.121516	0.00522193	0.0429732
rs877459	0.182235	0.0078329	0.0429824
rs4674406	0.364432	0.0156658	0.0429869
rs1442140	0.667071	0.0287206	0.0430548
rs1057220	0.242361	0.0104439	0.0430922
rs4899108	0.302601	0.0130548	0.0431421
rs45527334	0.181373	0.0078329	0.0431867
rs3198502	0.241451	0.0104439	0.0432546
rs9840993	0.905356	0.0391645	0.0432587
rs1046208	0.361172	0.0156658	0.0433749
rs12733378	0.120365	0.00522193	0.0433841
rs7019909	0.179847	0.0078329	0.0435531
rs4794037	0.239518	0.0104439	0.0436037
rs1856028	0.478581	0.0208877	0.0436451
rs7588538	0.298772	0.0130548	0.043695
rs1807434	0.29784	0.0130548	0.0438317
rs228942	0.178662	0.0078329	0.043842
rs2228248	0.11849	0.00522193	0.0440707
rs1909083	0.118356	0.00522193	0.0441206
rs7744329	0.236561	0.0104439	0.0441487
rs26307	0.768254	0.0339426	0.0441814
rs9878093	0.177155	0.0078329	0.0442149
rs10011990	0.117863	0.00522193	0.0443051
rs61731670	0.235678	0.0104439	0.0443141
rs1043903	0.412313	0.0182768	0.0443274
rs1133326	0.820039	0.0365535	0.0445753
rs4528317	0.878419	0.0391645	0.0445852
rs316759	0.876943	0.0391645	0.0446602
rs980442	0.876526	0.0391645	0.0446815
rs7435347	0.175032	0.0078329	0.0447512
rs1225737	0.583251	0.0261097	0.0447657
rs11157781	0.291114	0.0130548	0.0448444
rs854544	0.581356	0.0261097	0.0449117
rs12809335	0.232466	0.0104439	0.0449264
rs1050223	0.289105	0.0130548	0.045156
rs7250080	0.115559	0.00522193	0.0451884
rs6541	0.173213	0.0078329	0.0452212
rs6063966	0.115192	0.00522193	0.0453324
rs1450522	0.345098	0.0156658	0.0453952
rs1046269	0.114982	0.00522193	0.0454152
rs4570	0.689135	0.0313316	0.0454651
rs17342754	0.229472	0.0104439	0.0455126
rs17537595	0.114645	0.00522193	0.0455487
rs33952257	0.171565	0.0078329	0.0456556
rs2302619	0.114338	0.00522193	0.045671
rs12422983	0.114278	0.00522193	0.045695
rs11588712	0.114265	0.00522193	0.0457002
rs4675331	0.856054	0.0391645	0.04575
rs180743	0.340857	0.0156658	0.04596
rs6474384	0.113542	0.00522193	0.0459912
rs4977421	0.28357	0.0130548	0.0460374
rs4650590	0.396846	0.0182768	0.046055
rs4897940	0.453484	0.0208877	0.0460606
rs1297	0.113125	0.00522193	0.0461607
rs314299	0.339125	0.0156658	0.0461948
rs842	0.225226	0.0104439	0.0463706
rs7867513	0.281333	0.0130548	0.0464035
rs7357	0.224922	0.0104439	0.0464333
rs9995	0.337099	0.0156658	0.0464724
rs2661280	0.7852	0.0365535	0.0465531
rs1134065	0.336417	0.0156658	0.0465666
rs10417473	0.279951	0.0130548	0.0466326
rs2228129	0.727339	0.0339426	0.0466668
rs11003862	0.391463	0.0182768	0.0466884
rs3194491	0.16764	0.0078329	0.0467245
rs9124	0.27921	0.0130548	0.0467563
rs4891164	0.837516	0.0391645	0.0467627
rs17020500	0.278755	0.0130548	0.0468326
rs17085231	0.278717	0.0130548	0.046839
rs1050527	0.111002	0.00522193	0.0470436
rs13393608	0.166464	0.0078329	0.0470546
rs2234500	0.110916	0.00522193	0.0470801
rs2919051	0.166351	0.0078329	0.0470866
rs2001616	0.83047	0.0391645	0.0471594
rs17368528	0.110646	0.00522193	0.0471949
rs8834	0.331071	0.0156658	0.0473185
rs14240	0.495261	0.0234987	0.0474471
rs9889875	0.824854	0.0391645	0.0474805
rs1043124	0.164569	0.0078329	0.0475964
rs1451317	0.438396	0.0208877	0.0476458
rs2508031	0.219008	0.0104439	0.0476871
rs2297067	0.21898	0.0104439	0.0476932
rs12117082	0.218781	0.0104439	0.0477366
rs5949212	0.273296	0.0130548	0.0477681
rs12722115	0.163722	0.0078329	0.0478427
rs12595334	0.272841	0.0130548	0.0478478
rs2571	0.109106	0.00522193	0.0478611
rs7384	0.218023	0.0104439	0.0479026
rs7312601	0.326977	0.0156658	0.047911
rs12345886	0.217871	0.0104439	0.047936
rs1746239	0.163242	0.0078329	0.0479833
rs12037322	0.163128	0.0078329	0.0480169
rs1047185	0.380203	0.0182768	0.0480711
rs4452075	0.217016	0.0104439	0.0481249
rs17582855	0.108462	0.00522193	0.0481453
rs8069834	0.487404	0.0234987	0.0482119
rs1142585	0.270491	0.0130548	0.0482635
rs2293407	0.324275	0.0156658	0.0483102
rs2289490	0.216127	0.0104439	0.0483228
rs2657879	0.162002	0.0078329	0.0483506
rs4322591	0.539465	0.0261097	0.0483992
rs1042117	0.10789	0.00522193	0.0484005
rs3169983	0.10789	0.00522193	0.0484005
rs4246	0.161726	0.0078329	0.0484331
rs10502647	0.323034	0.0156658	0.0484958
rs439676	0.806141	0.0391645	0.0485827
rs494606	0.107476	0.00522193	0.048587
rs10792295	0.536887	0.0261097	0.0486316
rs1783742	0.482716	0.0234987	0.0486802
rs403904	0.375351	0.0182768	0.0486925
rs3740484	0.375237	0.0182768	0.0487072
rs3180589	0.320836	0.0156658	0.048828
rs1420022	0.801539	0.0391645	0.0488616
rs10750945	0.533702	0.0261097	0.0489218
rs6894729	0.16002	0.0078329	0.0489495
rs10744790	0.213208	0.0104439	0.0489844
rs1046994	0.639434	0.0313316	0.0489989
rs778370	0.319205	0.0156658	0.0490775
rs8053471	0.212412	0.0104439	0.049168
rs5006888	0.530711	0.0261097	0.0491975
rs4145513	0.106035	0.00522193	0.0492472
rs12548737	0.105848	0.00522193	0.0493343
rs17545279	0.105808	0.00522193	0.0493529
rs9542034	0.158693	0.0078329	0.0493588
rs3820594	0.317191	0.0156658	0.0493892
rs8040	0.211237	0.0104439	0.0494415
rs2072797	0.105552	0.00522193	0.0494726
rs11591374	0.105542	0.00522193	0.0494773
rs17240643	0.158086	0.0078329	0.0495483
rs4221	0.210441	0.0104439	0.0496285
rs2231292	0.2623	0.0130548	0.0497706
rs2228315	0.104883	0.00522193	0.0497882
rs5926895	0.262036	0.0130548	0.0498207
rs2036	0.785314	0.0391645	0.0498711
rs12437095	0.31386	0.0156658	0.0499133
rs9947104	0.261089	0.0130548	0.0500015
rs16986289	0.156646	0.0078329	0.0500038
rs159878	0.574039	0.0287206	0.0500325
rs35076	0.416999	0.0208877	0.0500906
rs10194257	0.260596	0.0130548	0.050096
rs9250	0.260464	0.0130548	0.0501214
rs4828078	0.260406	0.0130548	0.0501326
rs3737002	0.260097	0.0130548	0.0501922
rs7725	0.207749	0.0104439	0.0502715
rs1127678	0.207635	0.0104439	0.0502991
rs1061237	0.311434	0.0156658	0.0503021
rs1042912	0.207294	0.0104439	0.0503819
rs2219382	0.362158	0.0182768	0.0504663
rs8894	0.310221	0.0156658	0.0504988
rs3750300	0.103401	0.00522193	0.0505018
rs17613185	0.258397	0.0130548	0.0505224
rs13087612	0.258281	0.0130548	0.0505451
rs2727287	0.618508	0.0313316	0.0506567
rs72981482	0.10304	0.00522193	0.0506787
rs1805672	0.30897	0.0156658	0.0507033
rs2240743	0.514277	0.0261097	0.0507696
rs5840	0.410986	0.0208877	0.0508235
rs1047030	0.154011	0.0078329	0.0508593
rs7516087	0.359315	0.0182768	0.0508656
rs509648	0.307673	0.0156658	0.050917
rs16876315	0.15383	0.0078329	0.0509192
rs2272487	0.204349	0.0104439	0.051108
rs2285477	0.663638	0.0339426	0.0511462
rs1048364	0.305861	0.0156658	0.0512187
rs72608353	0.101941	0.00522193	0.051225
rs960996	0.305596	0.0156658	0.0512631
rs1437134	0.661877	0.0339426	0.0512823
rs16829204	0.1526	0.0078329	0.0513296
rs13559	0.610319	0.0313316	0.0513364
rs12724	0.254282	0.0130548	0.05134
rs10744716	0.507496	0.0261097	0.051448
rs17105353	0.456024	0.0234987	0.0515295
rs1801164	0.303674	0.0156658	0.0515875
rs34759087	0.101199	0.00522193	0.0516006
rs1054607	0.303359	0.0156658	0.0516411
rs7211442	0.151604	0.0078329	0.0516668
rs2227310	0.252454	0.0130548	0.0517117
rs12467225	0.302866	0.0156658	0.0517252
rs2693	0.35287	0.0182768	0.0517946
rs1574340	0.654068	0.0339426	0.0518945
rs4297946	0.553112	0.0287206	0.0519255
rs4776056	0.100538	0.00522193	0.0519399
rs11734833	0.451854	0.0234987	0.0520051
rs10120977	0.15058	0.0078329	0.0520182
rs13080329	0.150504	0.0078329	0.0520445
rs7259593	0.150239	0.0078329	0.0521362
rs2302061	0.150128	0.0078329	0.0521748
rs11645214	0.400182	0.0208877	0.0521956
rs2502607	0.249678	0.0130548	0.0522867
rs2758680	0.298961	0.0156658	0.0524008
rs1048371	0.498152	0.0261097	0.052413
rs55989856	0.149253	0.0078329	0.0524807
rs1455156	0.198461	0.0104439	0.0526243
rs714605	0.248048	0.0130548	0.0526303
rs1057807	0.446016	0.0234987	0.0526858
rs569	0.198082	0.0104439	0.052725
rs6737629	0.494427	0.0261097	0.0528079
rs1046221	0.44431	0.0234987	0.0528881
rs2279380	0.394344	0.0208877	0.0529683
rs2298887	0.147326	0.0078329	0.0531671
rs3733697	0.147326	0.0078329	0.0531671
rs10917051	0.49072	0.0261097	0.0532068
rs2297322	0.19583	0.0104439	0.0533313
rs2854464	0.342293	0.0182768	0.0533951
rs2456	0.341838	0.0182768	0.0534662
rs7128239	0.292137	0.0156658	0.0536248
rs3091281	0.291986	0.0156658	0.0536526
rs11848279	0.291682	0.0156658	0.0537085
rs10422063	0.680368	0.0365535	0.0537261
rs4129714	0.242513	0.0130548	0.0538315
rs2135720	0.242453	0.0130548	0.0538448
rs10050933	0.193912	0.0104439	0.0538588
rs1053889	0.581469	0.0313316	0.0538835
rs3831	0.193711	0.0104439	0.0539147
rs10792293	0.532527	0.0287206	0.0539327
rs1055409	0.193646	0.0104439	0.0539328
rs11657054	0.72446	0.0391645	0.0540603
rs10491046	0.2413	0.0130548	0.0541021
rs3814224	0.241034	0.0130548	0.0541618
rs1061437	0.337251	0.0182768	0.0541934
rs307822	0.722231	0.0391645	0.0542271
rs17707862	0.192585	0.0104439	0.0542299
rs10309	0.240655	0.0130548	0.0542471
rs56150479	0.28865	0.0156658	0.0542726
rs11714353	0.240466	0.0130548	0.0542897
rs1126965	0.240352	0.0130548	0.0543155
rs7205363	0.431837	0.0234987	0.0544157
rs306456	0.287702	0.0156658	0.0544515
rs3127242	0.622678	0.0339426	0.0545106
rs754554	0.191309	0.0104439	0.0545916
rs7568529	0.668893	0.0365535	0.0546478
rs74344827	0.143044	0.0078329	0.0547587
rs17270986	0.14277	0.0078329	0.0548638
rs1979399	0.237471	0.0130548	0.0549744
rs2306061	0.617295	0.0339426	0.054986
rs4144738	0.522043	0.0287206	0.0550158
rs1056292	0.237243	0.0130548	0.0550273
rs215607	0.711291	0.0391645	0.0550611
rs1062072	0.520889	0.0287206	0.0551377
rs1224329	0.189358	0.0104439	0.0551541
rs16939858	0.189097	0.0104439	0.0552302
rs1972820	0.66146	0.0365535	0.0552619
rs9429072	0.330086	0.0182768	0.0553697
rs7127978	0.330048	0.0182768	0.0553761
rs9652173	0.188301	0.0104439	0.0554637
rs8218	0.235234	0.0130548	0.0554972
rs10492	0.14114	0.0078329	0.0554974
rs11042983	0.376336	0.0208877	0.0555029
rs2499836	0.611213	0.0339426	0.0555331
rs3916	0.234551	0.0130548	0.0556588
rs6969321	0.609751	0.0339426	0.0556663
rs3232	0.233945	0.0130548	0.055803
rs4901065	0.233534	0.0130548	0.0559012
rs4272	0.186747	0.0104439	0.0559252
rs938605	0.186705	0.0104439	0.0559378
rs1128065	0.280006	0.0156658	0.0559481
rs8063925	0.140003	0.0078329	0.0559481
rs9374227	0.233012	0.0130548	0.0560264
rs2775	0.511676	0.0287206	0.0561305
rs1061015	0.325119	0.0182768	0.0562156
rs3219153	0.1857	0.0104439	0.0562405
rs20551	0.278225	0.0156658	0.0563062
rs3809306	0.370726	0.0208877	0.0563428
rs2278154	0.324178	0.0182768	0.0563788
rs3740438	0.231405	0.0130548	0.0564155
rs509103	0.416256	0.0234987	0.0564525
rs1057233	0.645917	0.0365535	0.0565917
rs9785	0.645879	0.0365535	0.056595
rs79161311	0.138373	0.0078329	0.0566071
rs4633461	0.138337	0.0078329	0.0566219
rs3742134	0.138335	0.0078329	0.0566227
rs1061782	0.553264	0.0313316	0.0566305
rs3736599	0.138032	0.0078329	0.056747
rs2289950	0.183697	0.0104439	0.0568538
rs10476	0.413299	0.0234987	0.0568564
rs13941	0.642207	0.0365535	0.0569186
rs1049931	0.411858	0.0234987	0.0570553
rs55679147	0.183031	0.0104439	0.0570606
rs8192798	0.228638	0.0130548	0.0570983
rs7246170	0.137046	0.0078329	0.0571552
rs2297334	0.182614	0.0104439	0.0571909
rs460137	0.639017	0.0365535	0.0572027
rs7197580	0.50182	0.0287206	0.0572329
rs2278392	0.136791	0.0078329	0.0572618
rs9830734	0.364317	0.0208877	0.0573339
rs774898	0.2275	0.0130548	0.0573839
rs17051586	0.136402	0.0078329	0.0574251
rs4949184	0.18183	0.0104439	0.0574375
rs10045685	0.498104	0.0287206	0.0576599
rs1133494	0.54246	0.0313316	0.0577583
rs1846962	0.22568	0.0130548	0.0578466
rs10019009	0.270671	0.0156658	0.0578776
rs33729	0.541133	0.0313316	0.0579
rs1045814	0.405717	0.0234987	0.0579189
rs10937857	0.405565	0.0234987	0.0579406
rs1050782	0.539541	0.0313316	0.0580708
rs10802	0.269732	0.0156658	0.0580791
rs1521532	0.26905	0.0156658	0.0582263
rs2654980	0.179316	0.0104439	0.0582428
rs11945554	0.223747	0.0130548	0.0583464
rs12852	0.626355	0.0365535	0.0583591
rs673430	0.134203	0.0078329	0.058366
rs2684787	0.178937	0.0104439	0.0583662
rs16916191	0.357647	0.0208877	0.0584032
rs1168	0.357116	0.0208877	0.05849
rs3751821	0.133867	0.0078329	0.0585125
rs4830548	0.312136	0.0182768	0.0585538
rs2985698	0.222951	0.0130548	0.0585547
rs1043459	0.445244	0.0261097	0.0586412
rs878639	0.400662	0.0234987	0.0586497
rs2742946	0.444916	0.0261097	0.0586845
rs4832164	0.533702	0.0313316	0.0587062
rs1082	0.311017	0.0182768	0.0587645
rs7801498	0.577261	0.0339426	0.0587993
rs12608183	0.266207	0.0156658	0.0588482
rs6509305	0.265979	0.0156658	0.0588986
rs11768781	0.398666	0.0234987	0.0589433
rs1050816	0.35431	0.0208877	0.0589533
rs1053298	0.397528	0.0234987	0.059112
rs2274217	0.220816	0.0130548	0.0591209
rs1127775	0.529418	0.0313316	0.0591812
rs3812257	0.352604	0.0208877	0.0592385
rs11836	0.308401	0.0182768	0.059263
rs3813642	0.616574	0.0365535	0.0592849
rs12303082	0.176111	0.0104439	0.0593027
rs1334891	0.308098	0.0182768	0.0593213
rs3829923	0.307946	0.0182768	0.0593505
rs17741	0.307908	0.0182768	0.0593579
rs13166360	0.17586	0.0104439	0.0593874
rs1056468	0.307605	0.0182768	0.0594163
rs2040957	0.307453	0.0182768	0.0594457
rs11700721	0.175601	0.0104439	0.059475
rs1803956	0.175525	0.0104439	0.0595007
rs957465	0.394912	0.0234987	0.0595036
rs1136224	0.175222	0.0104439	0.0596036
rs2256388	0.525546	0.0313316	0.0596172
rs1536262	0.481613	0.0287206	0.0596342
rs6705802	0.35014	0.0208877	0.0596554
rs1135983	0.131214	0.0078329	0.0596956
rs28493702	0.131056	0.0078329	0.0597676
rs2184161	0.61104	0.0365535	0.0598218
rs11603779	0.261868	0.0156658	0.0598233
rs73594554	0.130602	0.0078329	0.0599753
rs3746854	0.217492	0.0130548	0.0600244
rs34169189	0.130448	0.0078329	0.0600461
rs10911825	0.347541	0.0208877	0.0601015
rs3795302	0.477785	0.0287206	0.060112
rs1047730	0.130184	0.0078329	0.0601679
rs7566538	0.520699	0.0313316	0.0601722
rs41275442	0.130113	0.0078329	0.0602007
rs743642	0.129805	0.0078329	0.0603436
rs17132677	0.129616	0.0078329	0.0604316
rs28655666	0.474602	0.0287206	0.0605152
rs10031753	0.129388	0.0078329	0.0605381
rs11718329	0.258578	0.0156658	0.0605844
rs3183732	0.387406	0.0234987	0.0606565
rs1132790	0.429373	0.0261097	0.0608088
rs4733994	0.214666	0.0130548	0.0608146
rs3924784	0.386193	0.0234987	0.060847
rs3744833	0.514558	0.0313316	0.0608903
rs6810	0.34252	0.0208877	0.0609825
rs699484	0.470089	0.0287206	0.0610961
rs3733434	0.25635	0.0156658	0.061111
rs335929	0.213511	0.0130548	0.0611436
rs3824997	0.426681	0.0261097	0.0611925
rs1059515	0.298658	0.0182768	0.0611963
rs17685420	0.170559	0.0104439	0.0612331
rs12214037	0.127834	0.0078329	0.061274
rs13284	0.170369	0.0104439	0.0613014
rs7041276	0.382516	0.0234987	0.0614319
rs13268757	0.127486	0.0078329	0.0614412
rs8508	0.381682	0.0234987	0.0615662
rs274674	0.337857	0.0208877	0.0618242
rs1059139	0.295587	0.0182768	0.0618321
rs12416605	0.211111	0.0130548	0.0618387
rs295918	0.337706	0.0208877	0.0618518
rs8086	0.253166	0.0156658	0.0618795
rs2896181	0.337251	0.0208877	0.0619353
rs13091808	0.168512	0.0104439	0.061977
rs10156987	0.209948	0.0130548	0.0621813
rs11894651	0.628706	0.0391645	0.0622938
rs518852	0.586739	0.0365535	0.0622995
rs3749395	0.167336	0.0104439	0.0624125
rs1048120	0.166616	0.0104439	0.0626822
rs15667	0.541474	0.0339426	0.0626855
rs3801156	0.208204	0.0130548	0.0627021
rs1053984	0.623702	0.0391645	0.0627936
rs3746680	0.665024	0.0417755	0.062818
rs7993754	0.581811	0.0365535	0.0628271
rs1051725	0.249299	0.0156658	0.0628394
rs1061599	0.24801	0.0156658	0.063166
rs6877992	0.534915	0.0339426	0.0634541
rs2270302	0.452271	0.0287206	0.0635031
rs11892744	0.246455	0.0156658	0.0635645
rs10015446	0.451171	0.0287206	0.063658
rs2685390	0.328001	0.0208877	0.0636819
rs1053932	0.450565	0.0287206	0.0637436
rs1536207	0.122669	0.0078329	0.0638539
rs12997	0.326977	0.0208877	0.0638813
rs2294942	0.612063	0.0391645	0.0639877
rs17749202	0.244446	0.0156658	0.0640869
rs8503	0.121882	0.0078329	0.0642662
rs61442297	0.162484	0.0104439	0.0642763
rs6948	0.527561	0.0339426	0.0643386
rs2071470	0.28404	0.0182768	0.0643457
rs20575	0.48687	0.0313316	0.0643531
rs10491974	0.121427	0.0078329	0.0645071
rs1043656	0.322731	0.0208877	0.0647218
rs6512087	0.725768	0.0469974	0.0647554
rs2112448	0.524073	0.0339426	0.0647669
rs10838092	0.402961	0.0261097	0.0647945
rs17740445	0.241754	0.0156658	0.0648006
rs17762463	0.201445	0.0130548	0.0648059
rs2227421	0.28156	0.0182768	0.0649125
rs880317	0.201039	0.0130548	0.0649368
rs710192	0.281181	0.0182768	0.065
rs10469862	0.320722	0.0208877	0.0651272
rs3180446	0.280385	0.0182768	0.0651845
rs7663	0.479718	0.0313316	0.0653125
rs1650972	0.199864	0.0130548	0.0653186
rs11823754	0.119835	0.0078329	0.065364
rs2144011	0.398324	0.0261097	0.0655488
rs7350928	0.159224	0.0104439	0.0655923
rs2298613	0.357343	0.0234987	0.0657595
rs3746673	0.277731	0.0182768	0.0658074
rs1216182	0.158602	0.0104439	0.0658495
rs11563	0.475358	0.0313316	0.0659116
rs1128474	0.236637	0.0156658	0.0662018
rs1175	0.157745	0.0104439	0.0662073
rs715	0.275608	0.0182768	0.0663143
rs4915691	0.157321	0.0104439	0.0663857
rs11544265	0.235878	0.0156658	0.0664148
rs10923360	0.314391	0.0208877	0.0664387
rs7295	0.667753	0.0443864	0.0664713
rs1144838	0.11775	0.0078329	0.0665214
rs11166964	0.117659	0.0078329	0.0665729
rs1704347	0.352263	0.0234987	0.0667078
rs733683	0.156304	0.0104439	0.0668176
rs3764795	0.117099	0.0078329	0.0668912
rs2281043	0.156103	0.0104439	0.0669037
rs1802267	0.156039	0.0104439	0.0669311
rs6032449	0.5069	0.0339426	0.0669611
rs573212	0.818376	0.0548303	0.0669989
rs17144716	0.272576	0.0182768	0.067052
rs10459078	0.389378	0.0261097	0.0670548
rs10336	0.622716	0.0417755	0.0670859
rs8239	0.233338	0.0156658	0.0671378
rs1008335	0.311099	0.0208877	0.0671417
rs2293177	0.233199	0.0156658	0.0671778
rs2295764	0.38853	0.0261097	0.0672011
rs3812422	0.349572	0.0234987	0.0672213
rs37035	0.582417	0.0391645	0.0672448
rs11547806	0.543435	0.0365535	0.0672638
rs11546426	0.271566	0.0182768	0.0673014
rs3735478	0.232516	0.0156658	0.0673751
rs3745033	0.348668	0.0234987	0.0673956
rs3747238	0.464705	0.0313316	0.0674225
rs7078243	0.58037	0.0391645	0.0674819
rs15818	0.348127	0.0234987	0.0675004
rs373610	0.657372	0.0443864	0.067521
rs2740174	0.115968	0.0078329	0.0675436
rs10369	0.270453	0.0182768	0.0675783
rs1126472	0.115862	0.0078329	0.0676054
rs12446	0.154295	0.0104439	0.0676876
rs8093101	0.154295	0.0104439	0.0676876
rs10504930	0.34707	0.0234987	0.0677059
rs10004905	0.536659	0.0365535	0.0681131
rs1726199	0.612217	0.0417755	0.0682364
rs2506	0.267609	0.0182768	0.0682965
rs1169312	0.382288	0.0261097	0.0682984
rs6011280	0.381871	0.0261097	0.068373
rs11919795	0.228486	0.0156658	0.0685635
rs17807723	0.113956	0.0078329	0.0687362
rs299643	0.417697	0.0287206	0.0687595
rs10842409	0.569452	0.0391645	0.0687758
rs2977235	0.30305	0.0208877	0.068925
rs10817478	0.265145	0.0182768	0.0689312
rs1105223	0.340387	0.0234987	0.0690352
rs10791010	0.226862	0.0156658	0.0690543
rs3204145	0.189049	0.0130548	0.0690553
rs10093964	0.378059	0.0261097	0.0690624
rs62284986	0.15119	0.0104439	0.0690777
rs2700	0.264573	0.0182768	0.0690802
rs2298095	0.113238	0.0078329	0.069172
rs164390	0.490484	0.0339426	0.0692022
rs9914073	0.226287	0.0156658	0.0692298
rs2066474	0.225864	0.0156658	0.0693594
rs1635242	0.600916	0.0417755	0.0695196
rs1047966	0.11267	0.0078329	0.0695207
rs7496	0.150201	0.0104439	0.0695326
rs1200428	0.187543	0.0130548	0.0696098
rs707910	0.112436	0.0078329	0.0696654
rs9444	0.561794	0.0391645	0.0697133
rs12151194	0.336985	0.0234987	0.0697322
rs1004363	0.336761	0.0234987	0.0697786
rs1079375	0.261923	0.0182768	0.0697791
rs10559	0.299289	0.0208877	0.0697912
rs2292826	0.224392	0.0156658	0.0698144
rs3734805	0.112101	0.0078329	0.0698736
rs1058398	0.447418	0.0313316	0.0700276
rs896079	0.372773	0.0261097	0.0700417
rs8405	0.149026	0.0104439	0.0700808
rs3857053	0.22352	0.0156658	0.0700868
rs2240572	0.111593	0.0078329	0.0701917
rs229648	0.111343	0.0078329	0.0703493
rs9372012	0.111267	0.0078329	0.0703973
rs951366	0.370612	0.0261097	0.0704501
rs9606756	0.111077	0.0078329	0.0705177
rs2347132	0.18485	0.0130548	0.0706239
rs2293409	0.739177	0.0522193	0.0706452
rs5911	0.332505	0.0234987	0.0706717
rs8940	0.147758	0.0104439	0.0706822
rs3733491	0.554022	0.0391645	0.0706912
rs2273026	0.110788	0.0078329	0.0707017
rs3744723	0.295056	0.0208877	0.0707924
rs26848	0.442338	0.0313316	0.0708318
rs9261531	0.220866	0.0156658	0.070929
rs8833	0.404845	0.0287206	0.0709423
rs339065	0.184017	0.0130548	0.0709436
rs878372	0.330616	0.0234987	0.0710755
rs11653281	0.403859	0.0287206	0.0711155
rs525221	0.330427	0.0234987	0.0711161
rs4900132	0.183562	0.0130548	0.0711195
rs2153739	0.587308	0.0417755	0.0711304
rs11095951	0.440443	0.0313316	0.0711365
rs2020869	0.18341	0.0130548	0.0711784
rs2295964	0.403212	0.0287206	0.0712296
rs2857	0.183221	0.0130548	0.0712518
rs7828	0.293085	0.0208877	0.0712685
rs42039	0.183156	0.0130548	0.0712771
rs3180467	0.547615	0.0391645	0.0715183
rs12137696	0.255516	0.0182768	0.0715288
rs10177957	0.109429	0.0078329	0.0715797
rs1054135	0.218781	0.0156658	0.0716049
rs2031640	0.109365	0.0078329	0.0716216
rs7853747	0.400713	0.0287206	0.0716738
rs7919	0.582341	0.0417755	0.0717371
rs41411848	0.254476	0.0182768	0.0718212
rs1136683	0.218111	0.0156658	0.0718249
rs711822	0.545151	0.0391645	0.0718415
rs15532	0.108992	0.0078329	0.0718667
rs17565631	0.144931	0.0104439	0.0720609
rs2186754	0.543483	0.0391645	0.072062
rs79284865	0.181057	0.0130548	0.0721034
rs7288826	0.14478	0.0104439	0.0721361
rs12624	0.685723	0.0496084	0.0723446
rs12475412	0.54136	0.0391645	0.0723446
rs2075228	0.396884	0.0287206	0.0723653
rs17825899	0.108234	0.0078329	0.07237
rs7978353	0.39674	0.0287206	0.0723916
rs3735358	0.25218	0.0182768	0.0724751
rs2233896	0.144023	0.0104439	0.0725153
rs2070917	0.431761	0.0313316	0.072567
rs13064298	0.539541	0.0391645	0.0725885
rs3733023	0.287323	0.0208877	0.0726977
rs10840112	0.323072	0.0234987	0.0727352
rs3763162	0.502502	0.0365535	0.072743
rs6657616	0.214762	0.0156658	0.0729449
rs1393261	0.536849	0.0391645	0.0729525
rs7285896	0.214649	0.0156658	0.0729833
rs9277561	0.142846	0.0104439	0.0731128
rs2304547	0.392297	0.0287206	0.0732114
rs187034	0.46353	0.0339426	0.0732262
rs9621049	0.106827	0.0078329	0.0733232
rs8176746	0.106383	0.0078329	0.0736292
rs663925	0.353818	0.0261097	0.073794
rs13153325	0.353552	0.0261097	0.0738496
rs5850	0.317954	0.0234987	0.073906
rs11250317	0.141292	0.0104439	0.0739169
rs8133	0.423194	0.0313316	0.074036
rs17755118	0.10577	0.0078329	0.074056
rs8067470	0.10577	0.0078329	0.074056
rs17314986	0.105758	0.0078329	0.0740644
rs9276975	0.140837	0.0104439	0.0741557
rs16934621	0.10558	0.0078329	0.0741892
rs857148	0.492607	0.0365535	0.0742042
rs7911488	0.316644	0.0234987	0.0742117
rs10380	0.140674	0.0104439	0.0742416
rs2526830	0.632648	0.0469974	0.0742868
rs934303	0.351126	0.0261097	0.0743598
rs6052795	0.105315	0.0078329	0.0743759
rs10174	0.491205	0.0365535	0.074416
rs271246	0.105163	0.0078329	0.0744834
rs4144331	0.105121	0.0078329	0.0745132
rs9614653	0.139927	0.0104439	0.0746379
rs1403247	0.55965	0.0417755	0.0746457
rs11168215	0.279627	0.0208877	0.0746985
rs1469071	0.454175	0.0339426	0.0747345
rs12642285	0.314353	0.0234987	0.0747526
rs7024	0.558117	0.0417755	0.0748507
rs2270421	0.279058	0.0208877	0.0748508
rs34608771	0.24405	0.0182768	0.0748894
rs13021	0.104548	0.0078329	0.0749215
rs1050504	0.277807	0.0208877	0.0751879
rs311694	0.138828	0.0104439	0.0752288
rs112944024	0.104102	0.0078329	0.0752425
rs3864095	0.104026	0.0078329	0.0752975
rs4828534	0.346198	0.0261097	0.0754183
rs13292501	0.691978	0.0522193	0.0754638
rs291387	0.552644	0.0417755	0.075592
rs4970633	0.137994	0.0104439	0.0756835
rs61743859	0.206719	0.0156658	0.075783
rs6464573	0.274921	0.0208877	0.0759772
rs73168398	0.102893	0.0078329	0.0761266
rs758772	0.205702	0.0156658	0.0761577
rs349704	0.444765	0.0339426	0.0763157
rs2281224	0.171014	0.0130548	0.0763378
rs11689281	0.512892	0.0391645	0.0763601
rs486344	0.20483	0.0156658	0.0764819
rs4483821	0.511875	0.0391645	0.0765118
rs7365	0.61411	0.0469974	0.0765293
rs6717858	0.340397	0.0261097	0.0767036
rs4466675	0.306354	0.0234987	0.0767044
rs9554310	0.136098	0.0104439	0.0767378
rs12177	0.509895	0.0391645	0.0768089
rs34244025	0.305368	0.0234987	0.0769521
rs14205	0.101676	0.0078329	0.0770378
rs11644435	0.169421	0.0130548	0.0770556
rs17198	0.541701	0.0417755	0.077119
rs7845404	0.270832	0.0208877	0.0771243
rs16870033	0.10141	0.0078329	0.0772399
rs79361534	0.101257	0.0078329	0.0773566
rs1530936	0.370801	0.0287206	0.0774556
rs12778304	0.101031	0.0078329	0.0775296
rs8134	0.469368	0.0365535	0.0778782
rs487561	0.335204	0.0261097	0.0778919
rs16933086	0.167374	0.0130548	0.077998
rs2296484	0.301236	0.0234987	0.0780076
rs55781567	0.267609	0.0208877	0.0780532
rs7947780	0.334263	0.0261097	0.0781111
rs1294230	0.401092	0.0313316	0.0781157
rs4489623	0.400902	0.0313316	0.0781527
rs3197716	0.366897	0.0287206	0.0782798
rs598893	0.599763	0.0469974	0.0783599
rs3935066	0.498976	0.0391645	0.0784897
rs58830807	0.166246	0.0130548	0.0785272
rs676349	0.498029	0.0391645	0.078639
rs41739	0.431268	0.0339426	0.0787041
rs349700	0.463909	0.0365535	0.0787946
rs2241335	0.463606	0.0365535	0.0788461
rs10432306	0.496512	0.0391645	0.0788792
rs12138050	0.231632	0.0182768	0.0789043
rs7724813	0.13182	0.0104439	0.0792282
rs2943510	0.131671	0.0104439	0.0793179
rs7911	0.361892	0.0287206	0.0793624
rs1056036	0.526348	0.0417755	0.0793685
rs8840	0.361741	0.0287206	0.0793956
rs6185	0.229702	0.0182768	0.0795673
rs10985563	0.524452	0.0417755	0.0796554
rs155247	0.425392	0.0339426	0.0797912
rs1064717	0.228789	0.0182768	0.0798848
rs10898563	0.293843	0.0234987	0.0799702
rs1019762	0.130422	0.0104439	0.0800775
rs16929236	0.162863	0.0130548	0.0801584
rs62617790	0.130287	0.0104439	0.0801604
rs506813	0.13026	0.0104439	0.0801771
rs2240396	0.260103	0.0208877	0.0803056
rs2108393	0.389946	0.0313316	0.0803485
rs1776177	0.4873	0.0391645	0.0803704
rs17096738	0.259648	0.0208877	0.0804463
rs1130368	0.129688	0.0104439	0.0805307
rs34482796	0.486193	0.0391645	0.0805534
rs4705303	0.517439	0.0417755	0.080735
rs3183878	0.355275	0.0287206	0.0808406
rs4736794	0.128799	0.0104439	0.0810865
rs3807069	0.353904	0.0287206	0.0811537
rs3810618	0.160854	0.0130548	0.0811595
rs7064	0.546706	0.0443864	0.0811888
rs1140855	0.128516	0.0104439	0.0812651
rs3681	0.256691	0.0208877	0.081373
rs3753914	0.449086	0.0365535	0.0813954
rs56396897	0.256465	0.0208877	0.0814448
rs2705	0.576882	0.0469974	0.0814679
rs2241960	0.25635	0.0208877	0.0814813
rs1422627	0.800553	0.0652742	0.0815363
rs12990449	0.224138	0.0182768	0.0815425
rs3802482	0.671886	0.0548303	0.0816065
rs2256270	0.382819	0.0313316	0.0818444
rs2281584	0.318675	0.0261097	0.0819319
rs1298	0.127303	0.0104439	0.0820394
rs2241336	0.444664	0.0365535	0.0822048
rs1870259	0.476268	0.0391645	0.082232
rs2158013	0.698385	0.0574413	0.0822487
rs28394363	0.221927	0.0182768	0.0823548
rs3735894	0.316324	0.0261097	0.0825409
rs6764769	0.442528	0.0365535	0.0826016
rs62579910	0.126204	0.0104439	0.0827538
rs1256945	0.441201	0.0365535	0.0828501
rs1048866	0.346539	0.0287206	0.0828785
rs16879202	0.377777	0.0313316	0.0829367
rs7016671	0.47206	0.0391645	0.0829651
rs9921827	0.125844	0.0104439	0.0829906
rs4689412	0.534688	0.0443864	0.0830137
rs13547	0.125749	0.0104439	0.0830533
rs7812	0.156873	0.0130548	0.0832191
rs12192544	0.187909	0.0156658	0.0833691
rs1049606	0.594586	0.0496084	0.0834334
rs3829972	0.594018	0.0496084	0.0835132
rs3749474	0.406323	0.0339426	0.0835359
rs1055240	0.468648	0.0391645	0.0835691
rs911157	0.156077	0.0130548	0.0836435
rs1130459	0.530421	0.0443864	0.0836815
rs2830585	0.124646	0.0104439	0.0837882
rs17252094	0.248995	0.0208877	0.0838881
rs1046675	0.124308	0.0104439	0.084016
rs7793993	0.217403	0.0182768	0.0840686
rs4592971	0.900637	0.075718	0.0840716
rs3802980	0.526878	0.0443864	0.0842442
rs1188697	0.278322	0.0234987	0.0844299
rs6525447	0.185339	0.0156658	0.0845251
rs12178	0.154409	0.0130548	0.0845471
rs4958903	0.246986	0.0208877	0.0845705
rs4147611	0.308704	0.0261097	0.0845783
rs2819561	0.709417	0.0600522	0.0846501
rs12366671	0.123268	0.0104439	0.0847249
rs11728	0.21571	0.0182768	0.0847284
rs1060435	0.307491	0.0261097	0.084912
rs12456560	0.122914	0.0104439	0.0849689
rs7930678	0.245769	0.0208877	0.0849893
rs4940019	0.490733	0.0417755	0.0851287
rs2240079	0.275988	0.0234987	0.0851439
rs328694	0.429087	0.0365535	0.0851891
rs10274334	0.459598	0.0391645	0.0852147
rs1046521	0.214383	0.0182768	0.0852529
rs11433	0.642543	0.0548303	0.0853333
rs11072494	0.214004	0.0182768	0.0854038
rs1791161	0.488665	0.0417755	0.0854889
rs16918482	0.122109	0.0104439	0.085529
rs28679848	0.122034	0.0104439	0.0855816
rs6699701	0.335393	0.0287206	0.0856328
rs12242936	0.12192	0.0104439	0.0856616
rs7026304	0.487565	0.0417755	0.0856818
rs1147225	0.365115	0.0313316	0.0858129
rs7199993	0.578036	0.0496084	0.0858223
rs7954	0.638866	0.0548303	0.0858244
rs10375	0.486618	0.0417755	0.0858486
rs1063647	0.547312	0.0469974	0.0858695
rs11346	0.212753	0.0182768	0.085906
rs2291043	0.151945	0.0130548	0.0859181
rs2238977	0.24293	0.0208877	0.0859825
rs753086	0.212563	0.0182768	0.0859828
rs747640	0.606149	0.0522193	0.0861493
rs1042800	0.151452	0.0130548	0.0861978
rs10872646	0.423825	0.0365535	0.0862467
rs3802885	0.121048	0.0104439	0.0862787
rs2419874	0.392297	0.0339426	0.0865226
rs2277283	0.2413	0.0208877	0.0865633
rs1050671	0.180908	0.0156658	0.0865954
rs7047712	0.120517	0.0104439	0.0866588
rs6761600	0.150466	0.0130548	0.0867627
rs1107187	0.15039	0.0130548	0.0868065
rs4013	0.540602	0.0469974	0.0869353
rs1060700	0.47987	0.0417755	0.0870558
rs783067	0.209606	0.0182768	0.0871958
rs2280443	0.389112	0.0339426	0.0872308
rs4518	0.6582	0.0574413	0.0872702
rs67661616	0.239214	0.0208877	0.0873182
rs3802228	0.536735	0.0469974	0.0875616
rs7408	0.566229	0.0496084	0.0876118
rs9892256	0.922673	0.0809399	0.0877233
rs11984293	0.148608	0.0130548	0.0878474
rs2502600	0.592729	0.0522193	0.0880998
rs12684650	0.237082	0.0208877	0.0881034
rs6453373	0.829652	0.0731071	0.0881177
rs953001	0.50345	0.0443864	0.0881645
rs11700569	0.354879	0.0313316	0.0882881
rs7929576	0.266055	0.0234987	0.0883227
rs2272263	0.206764	0.0182768	0.0883943
rs11545787	0.206346	0.0182768	0.0885734
rs3762636	0.500979	0.0443864	0.0885994
rs2295665	0.147054	0.0130548	0.0887758
rs669740	0.499545	0.0443864	0.0888537
rs712	0.557813	0.0496084	0.0889337
rs953002	0.498863	0.0443864	0.0889752
rs5022943	0.410759	0.0365535	0.0889902
rs713841	0.616082	0.0548303	0.0889984
rs2419873	0.381265	0.0339426	0.0890262
rs16986050	0.146502	0.0130548	0.0891103
rs4351475	0.380223	0.0339426	0.0892701
rs4441525	0.380089	0.0339426	0.0893016
rs698859	0.3799	0.0339426	0.089346
rs4148904	0.321139	0.0287206	0.0894336
rs1236093	0.349913	0.0313316	0.0895411
rs2076828	0.437145	0.0391645	0.0895915
rs9479094	0.465502	0.0417755	0.0897428
rs1141168	0.465464	0.0417755	0.0897501
rs555754	0.348552	0.0313316	0.0898907
rs5194	0.377436	0.0339426	0.0899293
rs1065355	0.203086	0.0182768	0.0899952
rs17135626	0.203055	0.0182768	0.0900089
rs548	0.11593	0.0104439	0.0900877
rs11539445	0.115824	0.0104439	0.0901701
rs1294231	0.635947	0.0574413	0.090324
rs10434809	0.37573	0.0339426	0.0903376
rs7442	0.259838	0.0234987	0.0904359
rs4072924	0.490424	0.0443864	0.0905062
rs67021676	0.173061	0.0156658	0.0905218
rs56302843	0.201683	0.0182768	0.0906212
rs11731285	0.144016	0.0130548	0.0906485
rs17659353	0.172796	0.0156658	0.0906606
rs1050334	0.259155	0.0234987	0.0906743
rs10140554	0.23023	0.0208877	0.0907255
rs2509010	0.230134	0.0208877	0.0907633
rs2257167	0.172537	0.0156658	0.0907967
rs2230600	0.172518	0.0156658	0.0908067
rs6742200	0.372849	0.0339426	0.0910357
rs7305599	0.515733	0.0469974	0.0911274
rs2242237	0.31458	0.0287206	0.0912983
rs12658464	0.314505	0.0287206	0.0913201
rs6967117	0.885735	0.0809399	0.0913817
rs1055256	0.571044	0.0522193	0.0914454
rs878567	0.570248	0.0522193	0.091573
rs655719	0.710744	0.0652742	0.0918392
rs34552277	0.198728	0.0182768	0.0919687
rs7159558	0.510729	0.0469974	0.0920202
rs1980577	0.538706	0.0496084	0.092088
rs7827446	0.254727	0.0234987	0.0922505
rs3809839	0.310979	0.0287206	0.0923555
rs5949244	0.338653	0.0313316	0.0925183
rs2279908	0.620707	0.0574413	0.0925417
rs5922906	0.564258	0.0522193	0.0925451
rs2304186	0.451096	0.0417755	0.0926088
rs7779099	0.845667	0.078329	0.0926239
rs1053407	0.45102	0.0417755	0.0926244
rs9423	0.16908	0.0156658	0.0926532
rs10973690	0.450868	0.0417755	0.0926556
rs35813871	0.169054	0.0156658	0.0926674
rs3806366	0.168967	0.0156658	0.0927151
rs2302479	0.563063	0.0522193	0.0927415
rs4755571	0.33763	0.0313316	0.0927986
rs9291808	0.393358	0.0365535	0.0929269
rs1051774	0.168246	0.0156658	0.0931124
rs7666844	0.44829	0.0417755	0.0931885
rs1045289	0.363674	0.0339426	0.0933324
rs3756987	0.16763	0.0156658	0.0934546
rs17806752	0.111646	0.0104439	0.0935445
rs12386117	0.111509	0.0104439	0.0936594
rs2230167	0.250831	0.0234987	0.0936834
rs2931403	0.666761	0.0626632	0.0939815
rs12439	0.333119	0.0313316	0.0940553
rs133902	0.499427	0.0469974	0.0941026
rs1053941	0.166351	0.0156658	0.0941731
rs1133154	0.138411	0.0130548	0.0943193
rs1565817	0.580715	0.0548303	0.0944186
rs3798104	0.607855	0.0574413	0.0944983
rs1860	0.607465	0.0574413	0.094559
rs1944805	0.606756	0.0574413	0.0946694
rs1050054	0.468748	0.0443864	0.0946914
rs2725371	0.882099	0.0835509	0.0947183
rs1570246	0.468042	0.0443864	0.0948343
rs13490	0.357798	0.0339426	0.0948651
rs1128433	0.385097	0.0365535	0.0949203
rs1044931	0.357078	0.0339426	0.0950564
rs12534131	0.356926	0.0339426	0.0950969
rs4777306	0.164683	0.0156658	0.095127
rs16022	0.109706	0.0104439	0.0951987
rs3738829	0.575404	0.0548303	0.0952901
rs12845035	0.164379	0.0156658	0.0953029
rs1045411	0.219084	0.0208877	0.0953412
rs13431828	0.164228	0.0156658	0.0953905
rs1050255	0.136819	0.0130548	0.0954168
rs1033325	0.300249	0.0287206	0.095656
rs10936600	0.272622	0.0261097	0.0957724
rs7571968	0.490484	0.0469974	0.0958184
rs3740447	0.163458	0.0156658	0.0958399
rs131842	0.217833	0.0208877	0.0958887
rs8798	0.652968	0.0626632	0.0959667
rs1324502	0.272024	0.0261097	0.0959829
rs6644	0.516814	0.0496084	0.0959888
rs6658382	0.43506	0.0417755	0.0960223
rs678	0.326014	0.0313316	0.0961051
rs2281810	0.570513	0.0548303	0.096107
rs3744867	0.380081	0.0365535	0.096173
rs7350974	0.922215	0.0887728	0.0962605
rs6569	0.51505	0.0496084	0.0963176
rs9898164	0.135381	0.0130548	0.0964303
rs931605	0.135226	0.0130548	0.0965408
rs9093	0.459739	0.0443864	0.096547
rs1126973	0.702745	0.0678851	0.0965999
rs1434536	0.594473	0.0574413	0.0966255
rs3888190	0.32421	0.0313316	0.0966398
rs2270288	0.431193	0.0417755	0.0968834
rs35448215	0.188418	0.0182768	0.0970011
rs2706747	0.914209	0.0887728	0.0971034
rs805506	0.215103	0.0208877	0.0971057
rs4763562	0.698233	0.0678851	0.0972242
rs1054637	0.536584	0.0522193	0.0973181
rs11699879	0.268216	0.0261097	0.0973457
rs3816300	0.134048	0.0130548	0.0973892
rs7897978	0.107188	0.0104439	0.097435
rs3743337	0.481993	0.0469974	0.0975064
rs10845552	0.45519	0.0443864	0.0975119
rs12453124	0.133719	0.0130548	0.0976288
rs11550558	0.106907	0.0104439	0.0976911
rs3819191	0.18686	0.0182768	0.0978099
rs6780	0.400409	0.0391645	0.0978112
rs6788865	0.400258	0.0391645	0.0978481
rs2071552	0.426909	0.0417755	0.0978556
rs10364	0.133331	0.0130548	0.0979129
rs6219	0.106642	0.0104439	0.0979339
rs7734	0.586019	0.0574413	0.0980194
rs9410438	0.10649	0.0104439	0.0980737
rs431750	0.770377	0.075718	0.098287
rs7419	0.503829	0.0496084	0.0984627
rs7201	0.396467	0.0391645	0.0987837
rs1049581	0.528092	0.0522193	0.098883
rs12897363	0.132004	0.0130548	0.0988972
rs1050448	0.237584	0.0234987	0.0989069
rs3088365	0.527902	0.0522193	0.0989186
rs11911	0.342956	0.0339426	0.0989706
rs7896053	0.131897	0.0130548	0.0989775
rs10789646	0.237395	0.0234987	0.0989856
rs7266872	0.105505	0.0104439	0.0989893
rs2306248	0.606383	0.0600522	0.0990335
rs11550908	0.13171	0.0130548	0.099118
rs7186799	0.394988	0.0391645	0.0991536
rs2296743	0.420843	0.0417755	0.0992661
rs11732122	0.394306	0.0391645	0.0993251
rs20544	0.420419	0.0417755	0.0993662
rs1056616	0.131359	0.0130548	0.0993828
rs6536	0.682842	0.0678851	0.0994156
rs476037	0.157442	0.0156658	0.099502
rs3736213	0.734324	0.0731071	0.0995569
rs710175	0.157025	0.0156658	0.0997663
rs7216041	0.130677	0.0130548	0.0999015
rs3741276	0.130639	0.0130548	0.0999306
rs3088075	0.182804	0.0182768	0.0999801
rs1702003	0.104432	0.0104439	0.100006
rs651141	0.365039	0.0365535	0.100136
rs679581	0.469331	0.0469974	0.100137
rs3781373	0.625749	0.0626632	0.100141
rs3816661	0.443172	0.0443864	0.100156
rs12221107	0.104174	0.0104439	0.100254
rs4072401	0.260368	0.0261097	0.10028
rs486055	0.104084	0.0104439	0.100341
rs1050283	0.415915	0.0417755	0.100442
rs740777	0.311569	0.0313316	0.100561
rs2038976	0.570513	0.0574413	0.100684
rs9204	0.31113	0.0313316	0.100703
rs3217751	0.41436	0.0417755	0.100819
rs2252929	0.828607	0.0835509	0.100833
rs3734313	0.181083	0.0182768	0.10093
rs6130615	0.258435	0.0261097	0.10103
rs2290693	0.516794	0.0522193	0.101045
rs1874008	0.77485	0.078329	0.101089
rs7164	0.43832	0.0443864	0.101265
rs2292827	0.592008	0.0600522	0.101438
rs10064975	0.668625	0.0678851	0.101529
rs3664	0.231291	0.0234987	0.101598
rs9100	0.359618	0.0365535	0.101645
rs9864094	0.179581	0.0182768	0.101774
rs11744	0.256502	0.0261097	0.101791
rs6104	0.256459	0.0261097	0.101808
rs10604	0.256312	0.0261097	0.101867
rs800950	0.486959	0.0496084	0.101874
rs11084	0.538214	0.0548303	0.101875
rs36217730	0.102506	0.0104439	0.101885
rs11431	0.5123	0.0522193	0.101931
rs1942	0.639662	0.0652742	0.102045
rs13851	0.306581	0.0313316	0.102197
rs17452383	0.102139	0.0104439	0.102251
rs921597	0.459392	0.0469974	0.102303
rs1052015	0.15312	0.0156658	0.102311
rs6795271	0.255074	0.0261097	0.102361
rs10950842	0.407916	0.0417755	0.102412
rs760420	0.101751	0.0104439	0.102641
rs2306355	0.609864	0.0626632	0.102749
rs1872644	0.760179	0.078329	0.10304
rs590412	0.632914	0.0652742	0.103133
rs2353483	0.759421	0.078329	0.103143
rs1872645	0.758663	0.078329	0.103246
rs9304684	0.453257	0.0469974	0.103688
rs45542639	0.125895	0.0130548	0.103696
rs1800930	0.654599	0.0678851	0.103705
rs10810184	0.352301	0.0365535	0.103757
rs61941963	0.125721	0.0130548	0.10384
rs878992	0.201152	0.0208877	0.103841
rs1884082	0.426575	0.0443864	0.104053
rs56174824	0.100304	0.0104439	0.104122
rs1325432	0.175108	0.0182768	0.104374
rs13157656	0.22486	0.0234987	0.104504
rs6508841	0.573812	0.0600522	0.104655
rs2598116	0.149594	0.0156658	0.104722
rs61748600	0.124659	0.0130548	0.104724
rs12476328	0.747251	0.078329	0.104823
rs1127575	0.448025	0.0469974	0.104899
rs2255192	0.223823	0.0234987	0.104988
rs2307117	0.396808	0.0417755	0.105279
rs10076911	0.123995	0.0130548	0.105285
rs9789131	0.595155	0.0626632	0.105289
rs3745064	0.594814	0.0626632	0.105349
rs11060094	0.173098	0.0182768	0.105586
rs2286899	0.148343	0.0156658	0.105605
rs15739	0.395465	0.0417755	0.105636
rs2838003	0.691334	0.0731071	0.105748
rs7180169	0.666123	0.0704961	0.10583
rs553877	0.61665	0.0652742	0.105853
rs1260720	0.640875	0.0678851	0.105926
rs4044	0.394268	0.0417755	0.105957
rs2481952	0.466753	0.0496084	0.106284
rs1058067	0.122792	0.0130548	0.106317
rs7815	0.245267	0.0261097	0.106454
rs2016057	0.612215	0.0652742	0.10662
rs9573097	0.318296	0.0339426	0.106638
rs1047334	0.587308	0.0626632	0.106696
rs506028	0.121903	0.0130548	0.107092
rs10732706	0.6582	0.0704961	0.107104
rs2280721	0.755668	0.0809399	0.10711
rs1129463	0.584995	0.0626632	0.107117
rs694180	0.657385	0.0704961	0.107237
rs12149	0.511146	0.0548303	0.107269
rs3739586	0.657025	0.0704961	0.107296
rs2294689	0.121639	0.0130548	0.107324
rs2245906	0.145955	0.0156658	0.107333
rs6589829	0.704944	0.075718	0.10741
rs1042667	0.388704	0.0417755	0.107474
rs4956990	0.460573	0.0496084	0.10771
rs62076510	0.121048	0.0130548	0.107848
rs10987414	0.266245	0.0287206	0.107873
rs6001563	0.12075	0.0130548	0.108115
rs6930766	0.482978	0.0522193	0.108119
rs1053047	0.458791	0.0496084	0.108128
rs2388981	0.168802	0.0182768	0.108273
rs2239986	0.530408	0.0574413	0.108296
rs9207	0.649594	0.0704961	0.108523
rs2664369	0.600917	0.0652742	0.108624
rs11845640	0.143772	0.0156658	0.108963
rs10511400	0.143718	0.0156658	0.109004
rs711174	0.263349	0.0287206	0.109059
rs9509307	0.717325	0.078329	0.109196
rs3213837	0.143424	0.0156658	0.109227
rs13161	0.430093	0.0469974	0.109273
rs1053266	0.476792	0.0522193	0.109522
rs3000930	0.858177	0.0939948	0.109528
rs2292974	0.428236	0.0469974	0.109746
rs3742	0.142695	0.0156658	0.109785
rs2839227	0.190247	0.0208877	0.109793
rs1046310	0.451626	0.0496084	0.109844
rs9689	0.499052	0.0548303	0.109869
rs8277	0.308742	0.0339426	0.109938
rs1130680	0.664379	0.0731071	0.110038
rs3742926	0.11856	0.0130548	0.110112
rs2293172	0.1422	0.0156658	0.110167
rs1131665	0.236857	0.0261097	0.110234
rs2302310	0.236831	0.0261097	0.110246
rs757297	0.734059	0.0809399	0.110264
rs11767398	0.449829	0.0496084	0.110283
rs9142	0.544317	0.0600522	0.110326
rs2274673	0.567897	0.0626632	0.110343
rs2664529	0.661726	0.0731071	0.110479
rs1058184	0.661422	0.0731071	0.11053
rs2276288	0.519654	0.0574413	0.110537
rs1007337	0.637728	0.0704961	0.110543
rs4752769	0.613504	0.0678851	0.110651
rs2295683	0.636212	0.0704961	0.110806
rs2294619	0.211877	0.0234987	0.110907
rs5924606	0.588521	0.0652742	0.110912
rs2821142	0.352567	0.0391645	0.111084
rs10665	0.117408	0.0130548	0.111192
rs35996697	0.140874	0.0156658	0.111204
rs4658146	0.725001	0.0809399	0.111641
rs6415788	0.561228	0.0626632	0.111654
rs2071122	0.280331	0.0313316	0.111766
rs3924661	0.723292	0.0809399	0.111905
rs61749665	0.186634	0.0208877	0.111918
rs557	0.209834	0.0234987	0.111987
rs1137014	0.652779	0.0731071	0.111994
rs232851	0.605997	0.0678851	0.112022
rs2303242	0.442249	0.0496084	0.112173
rs25901	0.698193	0.078329	0.112188
rs3803884	0.581204	0.0652742	0.112309
rs10456372	0.394875	0.0443864	0.112406
rs2194525	0.139359	0.0156658	0.112413
rs1050379	0.209012	0.0234987	0.112427
rs10936636	0.394647	0.0443864	0.112471
rs500049	0.440897	0.0496084	0.112517
rs7913591	0.672492	0.075718	0.112593
rs4658359	0.741789	0.0835509	0.112634
rs10782959	0.671052	0.075718	0.112835
rs4146830	0.693874	0.078329	0.112886
rs2236654	0.18485	0.0208877	0.112998
rs2295190	0.115444	0.0130548	0.113084
rs1057355	0.369209	0.0417755	0.113149
rs6591	0.438392	0.0496084	0.11316
rs778798	0.783911	0.0887728	0.113244
rs2976230	0.207479	0.0234987	0.113258
rs783230	0.644818	0.0731071	0.113376
rs3757235	0.483585	0.0548303	0.113383
rs167772	0.50653	0.0574413	0.113401
rs13263453	0.137879	0.0156658	0.11362
rs2586038	0.597164	0.0678851	0.113679
rs1432531	0.711388	0.0809399	0.113777
rs1443076	0.137577	0.0156658	0.113869
rs4678478	0.297938	0.0339426	0.113925
rs6025931	0.526613	0.0600522	0.114035
rs1334688	0.54917	0.0626632	0.114105
rs898	0.137273	0.0156658	0.114121
rs1046199	0.754947	0.0861619	0.11413
rs850763	0.137222	0.0156658	0.114164
rs1127390	0.274297	0.0313316	0.114225
rs1523468	0.548536	0.0626632	0.114237
rs199231	0.159868	0.0182768	0.114324
rs1061332	0.822162	0.0939948	0.114326
rs945815	0.799199	0.0913838	0.114344
rs1043242	0.707446	0.0809399	0.114411
rs2523989	0.114078	0.0130548	0.114438
rs1374133	0.478884	0.0548303	0.114496
rs2071403	0.569376	0.0652742	0.114642
rs1054667	0.477709	0.0548303	0.114778
rs56382961	0.113693	0.0130548	0.114825
rs9548522	0.500038	0.0574413	0.114874
rs538118	0.363561	0.0417755	0.114906
rs13149269	0.113576	0.0130548	0.114944
rs931	0.136212	0.0156658	0.11501
rs1951119	0.612859	0.0704961	0.115028
rs2241739	0.792706	0.0913838	0.115281
rs2199644	0.837251	0.0966057	0.115384
rs8463	0.181022	0.0208877	0.115388
rs12556160	0.135643	0.0156658	0.115493
rs1431548	0.474373	0.0548303	0.115585
rs400345	0.293616	0.0339426	0.115602
rs10741752	0.699822	0.0809399	0.115658
rs892523	0.541664	0.0626632	0.115686
rs1535381	0.563765	0.0652742	0.115783
rs2835665	0.112745	0.0130548	0.115791
rs2896079	0.383236	0.0443864	0.11582
rs936587	0.518387	0.0600522	0.115844
rs4464231	0.563159	0.0652742	0.115907
rs10846411	0.60812	0.0704961	0.115925
rs10426455	0.180036	0.0208877	0.11602
rs1077420	0.359845	0.0417755	0.116093
rs1049269	0.561832	0.0652742	0.116181
rs9706	0.426606	0.0496084	0.116286
rs3739722	0.134647	0.0156658	0.116347
rs2515404	0.761771	0.0887728	0.116535
rs2287999	0.514823	0.0600522	0.116646
rs6443616	0.223823	0.0261097	0.116653
rs2784198	0.648988	0.075718	0.116671
rs7463174	0.178964	0.0208877	0.116715
rs760431	0.245811	0.0287206	0.11684
rs2675165	0.133899	0.0156658	0.116997
rs1045252	0.289939	0.0339426	0.117068
rs529125	0.691106	0.0809399	0.117117
rs1050705	0.467738	0.0548303	0.117224
rs11740697	0.356358	0.0417755	0.117229
rs3815962	0.356241	0.0417755	0.117267
rs1909586	0.645538	0.075718	0.117294
rs854551	0.823603	0.0966057	0.117296
rs47340	0.33346	0.0391645	0.117449
rs877034	0.222231	0.0261097	0.117489
rs1122955	0.177605	0.0208877	0.117608
rs9261533	0.221965	0.0261097	0.11763
rs4658661	0.443917	0.0522193	0.117633
rs3744208	0.487565	0.0574413	0.117813
rs1851682	0.531541	0.0626632	0.11789
rs589811	0.221283	0.0261097	0.117992
rs1800454	0.132721	0.0156658	0.118036
rs632111	0.397794	0.0469974	0.118145
rs11075721	0.397604	0.0469974	0.118201
rs11123946	0.772689	0.0913838	0.118267
rs3809830	0.154409	0.0182768	0.118366
rs3827318	0.132238	0.0156658	0.118467
rs7315731	0.439867	0.0522193	0.118716
rs9261532	0.219691	0.0261097	0.118847
rs3804034	0.787664	0.0939948	0.119334
rs11549081	0.153025	0.0182768	0.119436
rs13078	0.983661	0.117493	0.119445
rs15583	0.633642	0.075718	0.119497
rs1055246	0.131085	0.0156658	0.119509
rs3806782	0.109182	0.0130548	0.119569
rs7629	0.458336	0.0548303	0.119629
rs7150461	0.327263	0.0391645	0.119673
rs3732852	0.654106	0.078329	0.11975
rs1061735	0.261506	0.0313316	0.119812
rs17585	0.108843	0.0130548	0.119942
rs12049823	0.174128	0.0208877	0.119956
rs2072788	0.304595	0.0365535	0.120007
rs17438900	0.174031	0.0208877	0.120023
rs709210	0.630583	0.075718	0.120076
rs1042992	0.217302	0.0261097	0.120154
rs10798670	0.130374	0.0156658	0.12016
rs1056824	0.564372	0.0678851	0.120284
rs6892973	0.3037	0.0365535	0.120361
rs12373	0.628883	0.075718	0.120401
rs1382278	0.671469	0.0809399	0.120542
rs17112076	0.151596	0.0182768	0.120562
rs4148945	0.216468	0.0261097	0.120617
rs2249346	0.21643	0.0261097	0.120638
rs3764010	0.757298	0.0913838	0.120671
rs10035989	0.86538	0.104439	0.120685
rs43216	0.64895	0.078329	0.120701
rs232777	0.215831	0.0261097	0.120973
rs1061074	0.77686	0.0939948	0.120993
rs10883465	0.215748	0.0261097	0.121019
rs8078309	0.539327	0.0652742	0.121029
rs1488374	0.755023	0.0913838	0.121034
rs1243166	0.668625	0.0809399	0.121054
rs4827380	0.560657	0.0678851	0.121081
rs6085202	0.559709	0.0678851	0.121286
rs2291027	0.494926	0.0600522	0.121336
rs72767869	0.10759	0.0130548	0.121339
rs27072	0.172037	0.0208877	0.121414
rs4371716	0.279545	0.0339426	0.121421
rs15837	0.752066	0.0913838	0.12151
rs3824926	0.750284	0.0913838	0.121799
rs1062851	0.578778	0.0704961	0.121802
rs11765962	0.128516	0.0156658	0.121898
rs12117331	0.21408	0.0261097	0.121962
rs2335095	0.192395	0.0234987	0.122138
rs2881373	0.897301	0.109661	0.122212
rs8885	0.469937	0.0574413	0.122232
rs936451	0.726098	0.0887728	0.12226
rs2784846	0.851543	0.104439	0.122646
rs2758679	0.766245	0.0939948	0.122669
rs704705	0.680757	0.0835509	0.122732
rs12471868	0.148801	0.0182768	0.122827
rs2275299	0.488589	0.0600522	0.122909
rs28558789	0.594379	0.0731071	0.122997
rs11919970	0.106061	0.0130548	0.123088
rs1043235	0.657214	0.0809399	0.123156
rs4933621	0.190727	0.0234987	0.123206
rs6044842	0.190689	0.0234987	0.12323
rs31208	0.105848	0.0130548	0.123336
rs3026913	0.1905	0.0234987	0.123353
rs6815391	0.338653	0.0417755	0.123358
rs9298108	0.190045	0.0234987	0.123648
rs3787697	0.631056	0.078329	0.124124
rs1042031	0.146979	0.0182768	0.124349
rs1054260	0.503829	0.0626632	0.124374
rs3824576	0.272803	0.0339426	0.124422
rs1045653	0.188817	0.0234987	0.124452
rs3010886	0.734248	0.0913838	0.124459
rs1056392	0.335621	0.0417755	0.124472
rs3010890	0.734059	0.0913838	0.124491
rs62621912	0.146753	0.0182768	0.124541
rs1013013	0.209606	0.0261097	0.124565
[truncated: 3,695 more rows]
